1 **Deciphering the role of *Leptospira* surface protein LigA in**  
2 **modulating the host innate immune response**

3

4

5 Ajay Kumar<sup>1¶</sup>, Vivek P. Varma<sup>1,2¶</sup>, Kavela Sridhar<sup>1</sup>, Mohd Abdullah<sup>1,3</sup>, Pallavi Vyas<sup>1</sup>,  
6 Muhammed Ashiq T<sup>1□</sup>, Yung-Fu Chang<sup>4</sup>, Syed M. Faisal<sup>1\*</sup>

7

8 <sup>1</sup>Laboratory of Vaccine Immunology, National Institute of Animal Biotechnology,  
9 Hyderabad, India.

10 <sup>2</sup>Graduate Studies, Manipal Academy of Higher Education, Manipal, Karnataka, India

11 <sup>3</sup>Department of Biosciences, Integral University, Lucknow, India

12 <sup>4</sup>Department of Population Medicine and Diagnostic Sciences, College of Veterinary  
13 Medicine, Cornell University, Ithaca, NY, USA

14

15

16

17 <sup>¶</sup>Co-First Authors

18 □ Present address: University of Verona, Italy

19

20 \*Corresponding author: Syed M. Faisal ([faisal@niab.org.in](mailto:faisal@niab.org.in)), National Institute of Animal  
21 Biotechnology, Hyderabad-500032, India.

22

23

24

25 **Short running title:** Role of surface protein LigA in *Leptospira* host interaction

26 **Keywords:** Surface proteins, LigA, *Leptospira*, immune evasion, Host-Pathogen Interaction

27

28

29 **Abstract**

30 *Leptospira*, a zoonotic pathogen, is known to infect various hosts and can establish persistent  
31 infection. This remarkable ability of bacteria is attributed to its potential to modulate the host  
32 immune response by exploiting its surface proteins. We have identified and characterized the  
33 domain of the variable region of *Leptospira* immunoglobulin-like protein A (LAV) involved  
34 in immune modulation. The 11<sup>th</sup> domain (A<sub>11</sub>) of the variable region of LigA (LAV) induces  
35 a strong TLR4 dependent innate response leading to subsequent induction of humoral and  
36 cellular immune responses in mice. A<sub>11</sub> is also involved in acquiring complement regulator  
37 FH and binds to host protease Plasminogen (PLG), there by mediating functional activity to  
38 escape from complement-mediated killing. The deletion of A<sub>11</sub> domain significantly  
39 impaired TLR4 signaling and subsequent reduction in the innate and adaptive immune  
40 response. It also inhibited the binding of FH and PLG thereby mediating killing of bacteria.  
41 Our study discovered an unprecedented role of LAV as a nuclease capable of degrading  
42 Neutrophil Extracellular Traps (NETs). This nuclease activity was primarily mediated by A<sub>11</sub>.  
43 These results highlighted the moonlighting function of LigA and demonstrated that a single  
44 domain of a surface protein is involved in evading a myriad of host innate immune defenses,  
45 which might allow the persistence of *Leptospira* in different hosts for a long term without  
46 clearance.

47

48

49

50

51

52

53

54

55

56

57

58

## 59 **Introduction**

60 Leptospirosis is one of the most widespread bacterial zoonosis, particularly in developing  
61 countries like India, and one of the major neglected infectious diseases globally<sup>1</sup>. It is caused  
62 by the pathogenic spirochete of the genus *Leptospira* that can cause fatal infections involving  
63 multiple organs in human and animal hosts. According to WHO, there is a substantial  
64 economic burden of human leptospirosis with an estimated 1.03 million cases and 58,900  
65 deaths worldwide annually<sup>2</sup>. The actual burden may be much higher as a lot of cases are not  
66 reported due to difficulties associated with diagnosis<sup>2</sup>. The major challenge in combating this  
67 zoonosis has been the unavailability of early diagnostics and potent vaccines that can induce  
68 cross-protection against various serovars<sup>3</sup>. Understanding how *Leptospira* escapes from host  
69 innate immune defenses to disseminate and colonize in multiple organs for establishing  
70 infection will aid in devising prophylactic strategies.

71 Innate immune responses comprising of soluble factors like antimicrobial peptides and  
72 complement proteins, pattern recognition receptors like Toll-like receptors (TLRs) and NOD-  
73 like receptors (NLRs), and phagocytic cells such as Dendritic cells (DCs), neutrophils, and  
74 macrophages contribute to the killing and removal of invading pathogens by a variety of  
75 mechanisms<sup>4</sup>. Signaling through TLRs induces activation of innate immune cells leading to  
76 secretion of pro-inflammatory cytokines (IL-6, TNF- $\alpha$ ) and expression of surface molecules  
77 (CD80, CD86, MHC-II), thereby enabling these cells to become efficient in subsequent  
78 activation of adaptive response<sup>5,6</sup>. TLRs play a key role in promoting adaptive immune  
79 responses and are also essential for T-cell expansion, differentiation, and memory formation<sup>7</sup>.  
80 The Complement system is a vital part of innate immune defense that promptly kills the  
81 invading pathogen by opsonization and target lysis<sup>8</sup>. To prevent damage to the host cells, the  
82 complement system is tightly regulated by soluble plasma proteins like Factor H (FH) and  
83 C4b-binding protein (C4BP)<sup>9</sup>. FH and C4BP regulate the Alternative pathway (AP), Classical  
84 pathway (CP), and Lectin pathway of complement activation. Plasmin, the enzymatically  
85 active form of plasminogen (PLG) acts as a protease that potentially cleaves complement  
86 factors C3b, C4b and C5<sup>10</sup>. Neutrophils are major phagocytic cells that utilize a combination  
87 of reactive oxygen species (ROS), cytotoxic granules, antimicrobial peptides, and Neutrophil  
88 Extracellular Traps (NETs) to kill and degrade the invading pathogen<sup>11</sup>. However, pathogens  
89 have devised several strategies to escape from host innate immune defenses through a

90 mechanism mediated by their surface proteins<sup>12</sup>. These proteins may be pro-inflammatory  
91 where they can activate APCs like macrophages and DCs but might also enable the pathogen  
92 to avoid recognition through innate receptors (TLRs) through downregulation of their  
93 expression or causing antigenic variations to evade from host defences<sup>13,14</sup>. Pathogens escape  
94 from complement-mediated killing by expressing surface proteins that acquire complement  
95 regulators like FH and C4BP, act as proteases or acquire host proteases that can cleave  
96 complement components<sup>8,15</sup>. They may avoid killing by phagocytes like neutrophils by  
97 expressing surface proteins, which may help invading extravasation and chemotaxis,  
98 preventing opsonization and phagocytosis, promoting survival inside the neutrophil, and  
99 inducing apoptosis or cell death and degrading NETs by virtue of their nuclease activity<sup>16,17</sup>.

100 Like other pathogens, *Leptospira* has also evolved strategies to modulate the host's innate  
101 immune response by exploiting the capacities of its surface proteins to favor their  
102 pathogenesis<sup>18-20</sup>. Toll-like receptors like TLR2 and TLR4 play a major role in host defense  
103 as mice lacking these receptors were highly susceptible to *Leptospira* infection<sup>21</sup>. These  
104 bacteria likely modulate the expression of surface molecules (proteins, LPS) to avoid  
105 recognition through protective TLR2 and TLR4 and establish infection in the host. Several  
106 surface proteins of *Leptospira* have been identified as a potent activator of pro-inflammatory  
107 response via signaling through both TLR2 and TLR4<sup>22-24</sup>. Besides that, several proteins have  
108 been shown to acquire FH, C4BP and PLG on their surface or act as proteases to cleave  
109 complement components to evade killing<sup>25-30</sup>. *Leptospira* is known to induce NET; hence it is  
110 likely that it might express surface proteins/nucleases like other bacteria to evade NETosis<sup>31</sup>.  
111 Thus, identification and characterization of a surface protein involved in the modulation of  
112 the host innate immune response will aid in designing a better strategy to combat this  
113 bacterial zoonosis.

114 *Leptospira* immunoglobulin-like (Lig) proteins (LigA and LigB) are surface proteins having  
115 12-13 immunoglobulin-like repeat domains similar to an invasin of *Yersinia* and intimin of  
116 *E.coli*<sup>32</sup>. The N terminal region of LigA and LigB from domains 1 to 6.5 are conserved,  
117 whereas C terminal regions from domains 6.5 to 13 are variable<sup>32,33</sup>. Lig proteins are  
118 expressed during infection and have been shown to bind to multiple components of the host  
119 extracellular matrix (ECM), thereby mediating attachment to host cells<sup>34,35</sup>. They are the  
120 most promising vaccine candidate identified to date. Moreover, the variable region of LigA  
121 (LAV) comprising domain 6.5-13 (LAV) was shown to be sufficient to induce protection  
122 against challenge in the hamster model<sup>36-41</sup>. Despite various reports confirming the protective

123 role of LAV, its involvement in the modulation of the host innate immune response has not  
124 been studied extensively. Several groups demonstrated that Lig proteins bind to FH and  
125 C4BP to inhibit lectin, classical and alternative pathways; however, specific domains  
126 involved in binding to these regulators have not been characterized<sup>27,29,30,42,43</sup>. Further, the  
127 role of the protein in activation of the innate response or evasion from killing by phagocytes  
128 has not been reported so far. In the present study, we have demonstrated the role of LAV in  
129 modulating the host innate immune response. Using various assays, we identified the  
130 domain/s involved in activating of innate and subsequent adaptive immune response and  
131 evasion from complement-mediated killing via binding to FH and host protease PLG.  
132 Further, we demonstrated LAV's nuclease activity which might play a major role in evasion  
133 from Neutrophil extracellular traps (NETosis).

#### 134 **Results:**

##### 135 **LAV induced TLR4 dependent activation of mouse macrophages**

136 To test whether the immunogenicity of Variable region of A (LAV) correlates to innate  
137 immune response activation, we tested its ability to activate mouse macrophages. We cloned,  
138 expressed, and purified LAV in a soluble form (Sup Fig. 1). We stimulated mouse  
139 macrophages with varying doses (1, 2, and 5 $\mu$ g/ml) of the protein and our result shows that  
140 LAV induced production of pro-inflammatory cytokines (IL-6, TNF- $\alpha$ ) in dose-dependent  
141 manner (Fig. 1A). Taking into account that the purified protein might have LPS  
142 contamination, they were pre-treated twice with Polymyxin-B Agarose to remove the  
143 endotoxin activity. 500ng/ml LPS pre-incubated with the same concentrations of PMB-  
144 agarose was used as control. The concentration of LPS in final protein preparation varied  
145 from (0.10–0.15ng/ml). The effect was protein-specific because Proteinase-K plus heating  
146 abolished cytokine production (Sup Fig. 2). Besides, PMB inhibited the LPS induced  
147 cytokine production but did not attenuate the levels induced by LAV, indicating that the  
148 stimulatory effects observed were specific to protein and not due to contamination with LPS  
149 (Sup Fig. 2). Next, we tested whether this LAV-induced activation was via signaling through  
150 TLR2 or TLR4. As confirmed by confocal microscopy, LAV showed binding, specifically  
151 with TLR4 and failed to bind to the TLR2 receptor (Fig. 1B). To verify that this binding leads  
152 to activation and subsequent cytokine production, we stimulated WT, TLR2KO, TLR4KO  
153 and DKO macrophages and HEK-293T cells expressing these receptors with LAV. Our result  
154 shows that while WT and TLR2KO macrophages cells induced significant levels of IL-6 and  
155 TNF- $\alpha$ , TLR4KO and DKO macrophages failed to induce these cytokines (Fig. 1C).

156 Similarly, HEK-TLR4 stimulated with LAV produced significant levels of IL-8, whereas  
157 HEK-TLR2 cells didn't produce a significant level of this cytokine (Fig. 1D). These results  
158 indicate that LAV is a TLR4 ligand that induces signalling through this receptor for the  
159 production of pro-inflammatory cytokines.

160 **11<sup>th</sup> domain of the variable region of LigA (A<sub>11</sub>) is involved in signalling through TLR4**  
161 **for the activation and maturation of macrophages**

162 Since LAV induced TLR4-dependent activation of mouse macrophages, we aimed to identify  
163 and characterize the domain/s involved in activation. We cloned, expressed and purified the  
164 individual domain (A<sub>8</sub>-A<sub>13</sub>) and tested their ability to activate mouse macrophages  
165 (RAW264.7 cells). Our result shows that only 11<sup>th</sup> domain (A<sub>11</sub>) induced a significant level of  
166 IL-6 and TNF- $\alpha$  (Fig.2A). To confirm that A<sub>11</sub> is involved in the production of cytokines, we  
167 created domain deletion mutants of LAV(A $\Delta$ <sub>8</sub>-A $\Delta$ <sub>13</sub>) and purified the proteins in the soluble  
168 form (Sup Fig.1B). We tested the ability of these mutants to activate mouse macrophages,  
169 and our result shows that all the deletion mutants of LAV induced production of IL-6 and  
170 TNF- $\alpha$  except A $\Delta$ <sub>11</sub>, further confirming that this domain is involved in the activation of  
171 macrophages and subsequent production of cytokines (Fig. 2B). We tested its binding with  
172 the receptor to confirm that A<sub>11</sub> is involved in interaction and subsequent signaling via TLR4.  
173 Confocal microscopy confirmed the binding of A<sub>11</sub> with the mouse TLR4 as strong anti-A<sub>11</sub>  
174 fluorescence was observed on the surface of WT and TLR2KO cells but little fluorescence on  
175 TLR4KO or DKO cells. Further, there was very little anti-A $\Delta$ <sub>11</sub> fluorescence on the surface of  
176 all cell types indicating that this protein failed to bind to the TLR receptor (Fig. 2C). To  
177 confirm that this TLR4 binding leads to activation of these cells, we stimulated mouse WT,  
178 TLR2KO, TLR4KO, and DKO macrophages with LAV, A<sub>11</sub>, and A $\Delta$ <sub>11</sub>, and our results  
179 indicate that A<sub>11</sub> induced IL-6 and TNF- $\alpha$  production via signaling through TLR4 as  
180 TLR4KO and DKO macrophages failed to induce any significant level of these cytokines.  
181 Further, the inability of A $\Delta$ <sub>11</sub> to induce substantial levels of cytokines in WT or TLR2 KO  
182 macrophages indicates that the 11<sup>th</sup> domain is critical for signaling via TLR4 (Fig. 2D). To  
183 confirm whether stimulation with A<sub>11</sub> causes macrophage activation and maturation, we  
184 analyzed the expression of costimulatory molecules (CD80, CD86, and CD40) and the  
185 maturation marker (MHC-II) in RAW264.7 cells. Our Flow cytometry results show that LAV  
186 and A<sub>11</sub> significantly enhanced the expression of CD80, CD86, CD40, and MHCII, whereas  
187 A $\Delta$ <sub>11</sub> failed to upregulate them, indicating that this domain is involved in enhancing the  
188 expression of these surface molecules (Fig. 2E). To understand whether deletion of the 11<sup>th</sup>  
189 domain leads to structural changes in the protein, which might be contributing to impairing

190 its innate immune activity, we did CD spectroscopy and our result shows that deletion of A<sub>11</sub>  
191 has reduced the helix and beta sheets and, in turn, distorted the structure but didn't have any  
192 effect on proper folding of LAV (Sup. Fig. 3). In conclusion, our results demonstrate that A<sub>11</sub>  
193 is involved in TLR4 dependent activation and maturation of mouse macrophages.

#### 194 **A<sub>11</sub> induces immune activation via MAPK signaling involving the MyD88 adapter**

195 Since TLR4 involves both MyD88 and TRIF adapter for downstream signaling and A<sub>11</sub>  
196 induced immune activation through TLR4, we examined the adapter molecule involved in the  
197 signaling. We stimulated MyD88KO, TRIFKO, and TMDKO macrophages with A<sub>11</sub>, and our  
198 results show that the signaling pathway involves MyD88 adapter as MyD88KO macrophages  
199 failed to induce significant levels of IL-6 and TNF- $\alpha$ . In contrast, there was no difference in  
200 the production of these cytokines in TRIFKO macrophages (Fig. 3A). Because MAPKs are  
201 critical factors involved in cellular responses to inflammatory stimuli, we examined the  
202 activation of this pathway in response to A<sub>11</sub>. We stimulated mouse WT, TLR2KO,  
203 TLR4KO, and DKO macrophages with A<sub>11</sub> and analyzed the phosphorylation of P38, JNK,  
204 ERK and degradation of I $\kappa$ B $\alpha$  (Fig. 3B). Next, to elucidate the functional role of these  
205 kinases in A<sub>11</sub> induced macrophage activation and maturation, we used pharmacological  
206 inhibitors of these pathways and analyzed cytokines in RAW264.7 cells pre-treated with or  
207 without inhibitors of NF- $\kappa$ B, JNK, p38MAPK or ERK. IL-6 and TNF- $\alpha$  production was  
208 significantly blocked by p38 inhibitor (P <0.05, 50% inhibition with 2 $\mu$ g/ml A<sub>11</sub>) and by JNK  
209 and NF- $\kappa$ B (P, <0.05, 30% inhibition with 2 $\mu$ g/ml A<sub>11</sub>). ERK inhibitor didn't effect the  
210 production of cytokine, indicating that this pathway is not involved in signalling. The  
211 production of TNF- $\alpha$  was also significantly blocked by JNK, p38, and NF- $\kappa$ B inhibitor (P  
212 <0.05, 60% inhibition). A combination of all inhibitors completely inhibited A<sub>11</sub> induced  
213 cytokine production (Fig. 3C). All these results suggest that A<sub>11</sub> stimulates the production of  
214 pro-inflammatory cytokines through p38, JNK and NF- $\kappa$ B pathways. The ability of A<sub>11</sub> to  
215 regulate innate responses was further investigated based on the expression of key  
216 inflammatory cytokine and chemokine genes at various time points (4, 24, and 48h). WT,  
217 TLR2KO, TLR4KO and DKO mouse macrophage were stimulated with A<sub>11</sub>, and expression  
218 of mRNA transcript was analyzed by RT-PCR. A<sub>11</sub> induced CXCL10, IL-1 $\beta$ , TNF- $\alpha$ , COX2,  
219 iNOS, MCP-1, and IL-6 in WT and TLR2KO mouse macrophage at 4h and 24h time point  
220 which was significantly reduced or down-regulated in TLR4KO and DKO macrophages (Fig.  
221 3D). PAM3CSK4 (TLR2 ligand) and LPS (TLR4 ligand) showed significant upregulation of  
222 genes involved in TLR2 and TLR4 signalling as expected. These results demonstrate that A<sub>11</sub>  
223 induced TLR4 dependent expression of innate response genes.

224

225 **A<sub>11</sub> is an immuno-dominant domain that induces a strong adaptive immune response**

226 To test whether the innate response induced by A<sub>11</sub> correlates to subsequent induction of  
227 adaptive response, we evaluated antigen-specific humoral, and cell-mediated immune  
228 response in mice immunized with LAV and A<sub>11</sub> in alum adjuvant. Our results show that mice  
229 immunized with A<sub>11</sub> with or without alum adjuvant-induced strong antibody response at day  
230 28 post-immunization (Fig. 4A). The generation of high levels of IgG1 and significant levels  
231 of IgG2c against A<sub>11</sub>, indicates a mixed Th1 and Th2 response (Fig.4A). A<sub>11</sub> failed to induce  
232 a significant level of IgA. A<sub>11</sub> induced proliferation generation of T cells secreting significant  
233 levels of IL-4 and IL-10 (Th2 cytokines) and high levels of IFN- $\gamma$  (Th1 cytokine) (Fig. 4B,  
234 4C). There was no significant enhancement in antibody levels against A<sub>11</sub> with the addition of  
235 alum adjuvant; however, cells obtained from Alum-A<sub>11</sub> immunized animals produced higher  
236 levels of IL-10 and IFN- $\gamma$  (Fig 4A, 4B, 4C). To test whether A<sub>11</sub> is an immuno-dominant  
237 domain, we analysed IgG response at day 28 in animals immunized with LAV or A<sub>11</sub> or A $\Delta$ <sub>11</sub>  
238 in Freund's adjuvant. Our results show that A $\Delta$ <sub>11</sub> immunized animals induced significantly  
239 lower levels of IgG than those immunized with LAV or A<sub>11</sub> (Fig.4D). This result correlated to  
240 a significant decrease in levels of IgG, cell proliferation, and induction of cytokines when  
241 serum and lymphocytes isolated from LAV-Alum immunized animals were used to analyze  
242 the response against A $\Delta$ <sub>11</sub>(Fig. 4E, 4F, 4G). Altogether, these results indicate that A<sub>11</sub> is an  
243 immuno-dominant domain, and its deletion significantly impairs the ability of LAV to induce  
244 a robust adaptive immune response.

245

246 ***Leptospira* evades complement-mediated killing by acquiring complement regulators**  
247 **through A<sub>11</sub>**

248 *Leptospira* evades complement-mediated killing by acquiring complement regulators (FH  
249 and C4BP) or host proteases (PLG) which involves binding with surface proteins. Lig  
250 proteins, including LigA have been shown to bind to FH, C4BP and PLG. However, except  
251 for C4BP the domain/s of LigA involved in binding to FH or PLG have not been  
252 characterized. To identify and characterize the domain of LAV involved in binding to FH and  
253 PLG, we screened the individual domains (A<sub>8</sub>-A<sub>13</sub>) and corresponding deletion mutants (A $\Delta$ <sub>8</sub>-  
254 A $\Delta$ <sub>13</sub>) for their ability to bind with FH and PLG. Our dot blot result shows that only A<sub>11</sub> and  
255 all the deletion mutants except A $\Delta$ <sub>11</sub> were able to bind to FH and PLG (Fig. 5A). This binding  
256 was further confirmed by pulldown assay and ELISA, and our result shows that while A<sub>11</sub> led  
257 to strong binding, A $\Delta$ <sub>11</sub> failed to bind to both FH and PLG (Fig. 5B, 5C). We further



258 determined if the binding of A<sub>11</sub> with FH is sufficient for its functional activity. Our result  
259 shows that both LAV and A<sub>11</sub> were able to bind to FH to cleave C3b in the presence of Factor  
260 I (FI) as evidenced by cleavage fragments. In contrast, AΔ<sub>11</sub> failed to do so, indicating that  
261 the 11<sup>th</sup> domain is involved in binding with and mediating the cofactor activity (Fig. 5D). Our  
262 ELISA result shows that A<sub>11</sub> binds with PLG and converts it into active plasmin, whereas  
263 AΔ<sub>11</sub> failed to generate a significant level of plasmin (Fig.5E). Western blot analysis further  
264 confirms that the released plasmin was able to cleave C3b in presence of A<sub>11</sub> whereas failed  
265 to do so in presence of AΔ<sub>11</sub> indicating that 11<sup>th</sup> domain is involved in PLG binding and  
266 mediating subsequent plasmin activity (Fig.5E). To establish the role of A<sub>11</sub> in the  
267 complement-mediated killing, we incubated *E. coli* with 10% Normal Human Serum (NHS)  
268 pre-incubated with A<sub>11</sub> or LAV or AΔ<sub>11</sub>. Our results show that both LAV and A<sub>11</sub> domains  
269 could rescue bacteria from complement-mediated killing, but AΔ<sub>11</sub> failed to do so, indicating  
270 that the 11<sup>th</sup> domain is involved in evasion from complement-mediated killing (Fig. 5F, Sup.  
271 Fig.3).

272

### 273 **LAV is a nuclease involved in the evasion of *Leptospira* from neutrophil extracellular** 274 **traps.**

275 Recently it has been shown that *Leptospira* induces NET; however, a protein with nuclease  
276 activity to degrade NET has not been reported. To test whether LAV has nuclease activity,  
277 which might have a role in evasion from NETs, we incubated plasmid or linear DNA with  
278 varying concentrations of the protein (1 to 10μg), and our result shows that LAV was able to  
279 degrade both plasmid and linear DNA in a dose-dependent manner indicating that its having  
280 both endo and exonuclease activity (Fig 6A, 6B). To analyze if this activity is restricted to  
281 any domain, we incubated the linear DNA with individual domains (A<sub>8</sub>-A<sub>13</sub>) or deletion  
282 mutants (AΔ<sub>8</sub>-AΔ<sub>13</sub>) and our result shows that A<sub>11</sub> and A<sub>13</sub> were able to degrade DNA  
283 whereas all the deletion mutants except AΔ<sub>11</sub> degraded DNA with equal propensity (Fig. 6C,  
284 6D). Further, AΔ<sub>11</sub> was also not able to cause significant degradation of plasmid DNA (Fig.  
285 6E). These results indicate that LAV's nuclease activity primarily resides in 11<sup>th</sup> domain, and  
286 LAV is mediating this activity by utilizing this domain. To test whether LAV can cleave the  
287 Neutrophil Extracellular Trap (NET) we stimulated the mouse neutrophils with PMA to  
288 induce NET and then treated them with LAV (5μg/ml). Our confocal microscopy result  
289 shows that LAV could degrade the PMA induced NET, further confirming its nuclease  
290 activity and possible role in degrading NETs *in vivo* (Fig.6F). These results indicate that LAV  
291 has nuclease activity that *Leptospira* might exploit to evade from NETosis.

292

## 293 **Discussion**

294 The ability of *Leptospira* to cause persistent infection and efficient colonization in a variety  
295 of hosts reflects its potential to subvert or thwart the innate immune response<sup>15</sup>. This ability  
296 has been attributed to the procession of a wide variety of surface molecules like proteins,  
297 lipopolysaccharide, etc., which are redundant in their function and may also undergo  
298 structural variation to avoid recognition by the host immune system been observed in other  
299 spirochetes<sup>12</sup>. Surface proteins, including lipoproteins from spirochetes like *Borrelia* and  
300 *Treponema* play a critical role in immune evasion by limiting their expression or inducing  
301 antigenic variation after infection, which greatly enhances host infectivity and  
302 persistence<sup>13,14,45</sup>. *Leptospira*, like other pathogens, may voluntarily interact with TLRs (or  
303 other innate receptors) through surface molecules (proteins, LPS) but might evade this  
304 recognition through multiple mechanisms to establish infection or fitness in the host<sup>46-48</sup>.  
305 Both TLR2 and TLR4 receptors play a major role in host defense against *Leptospira*  
306 infection<sup>21</sup>. It has been shown that TLR4 plays a critical role in controlling bacterial load and  
307 developing severe leptospirosis in mice<sup>49</sup>. Thus, it is likely that those surface proteins and  
308 LPS which are natural ligand of these receptors and can activate macrophages and DCs,  
309 might modulate their expression or undergo variations thereby enabling the bacteria to evade  
310 this innate recognition as has been reported for other pathogens. Several surface proteins of  
311 *Leptospira* have been identified as ligands of TLR2 or TLR4 capable of activating the innate  
312 immune response and are potential vaccine candidates<sup>22,23,50-52</sup>. Lig proteins are important  
313 virulence factors, and their expression during infection or loss of expression during *in vitro*  
314 culture has been correlated to virulence of the infecting serovar<sup>34,53</sup>. These proteins interact  
315 with various host molecules, including extracellular matrix (ECM), coagulation cascade, and  
316 complement regulators. LigA is the most promising vaccine candidate. It has been  
317 demonstrated that the variable region of the protein comprising domains 10-13 (LigA<sub>10-13</sub>) is  
318 sufficient in inducing protection against challenge in the hamster model<sup>36-38,40</sup>. Thus, the  
319 diverse functions of LigA prompted us to investigate whether their role is limited to binding  
320 to host ECM and complement regulators, or they are also involved in the modulation of the  
321 host innate immune response, thereby contributing to infection and persistence in the host.  
322 Since several investigators have established the protective role of a variable region of LigA  
323 (LAV), we chose to decipher its role in the modulation of the host innate immune response.  
324 We cloned, expressed and purified the recombinant LAV and tested its ability to activate  
325 mouse macrophages. Our result shows that LAV could activate macrophages, as evident from

326 the production of pro-inflammatory cytokines (Fig.1). This effect was not due to  
327 contaminating LPS as pretreatment with Polymixin B didn't attenuate, whereas digestion  
328 with Proteinase K abrogated the cytokine production (sup Fig.1B). The LAV-induced  
329 activation was TLR4 dependent as evident from its binding to the receptor, induction of IL-8  
330 by TLR4 transfected HEK293 cells, and abrogation of cytokine production in TL4KO mouse  
331 macrophages. We expected that LAV might not signal through TLR2 as it is devoid of the  
332 signal sequence and hence lipidation. However, several non-acylated proteins like LcrV from  
333 *Yersinia*, MPB83, and PPE18 from *Mycobacterium*, PorB from *Neisseria* and FimA from *P.*  
334 *gingivalis* have been shown to signal through TLR2<sup>54-58</sup>. Although rare, several proteins  
335 from other bacterial pathogens have been reported to induce TLR4 dependent production of  
336 pro-inflammatory cytokines and expression of surface markers<sup>59,60</sup>. Further, lipidated  
337 recombinant proteins, which usually signal through TLR2 due to the lipid moiety, may signal  
338 through TLR4 if unlipidated as has been observed in the case of Omp16 and Omp19 of  
339 *Brucella*<sup>61,62</sup>. Moreover, recombinant unlipidated rBCSP31 from *Brucella abortus* and  
340 rLsa21 from *Leptospira* have been shown to signal through both TLR2 and TLR4 and induce  
341 activation of macrophages<sup>22,63</sup>. Since LAV is composed of several immunoglobulin-like  
342 repeat domains, we attempted to identify the domain involved in innate immune activation.  
343 Our results shows that A<sub>11</sub> is involved in TLR4 dependent activation of mouse macrophages  
344 leading to production of pro-inflammatory cytokines and expression of costimulatory  
345 molecules and maturation marker (Fig. 2 and 3). Further, A<sub>11</sub> modulated the expression of  
346 several innate responses related to genes (cytokines, chemokines, and surface receptors)  
347 involved in the activation and maturation of macrophages (Fig.3). Our results are in  
348 accordance with previous reports, where several TLR4 ligands, including bacterial proteins,  
349 have been shown to activate macrophages and DCs via signalling through the MAP kinase  
350 pathway, leading to the induction of cytokines, expression of surface markers, and immune  
351 response-related genes<sup>59,64-67</sup>. Since TLR, dependent activation of innate response, is essential  
352 for T cell expansion, differentiation, and memory formation, we tested the adaptive response  
353 induced by A<sub>11</sub> in mice. Our result shows that the strong innate response induced by A<sub>11</sub> also  
354 correlated to the generaion of higher level of adaptive response (Fig. 4). Interestingly the  
355 response generated against A<sub>11</sub> was equivalent to LAV and was significantly decreased in  
356 terms of antibody titer, cell proliferation, and cytokines in the absence of this domain,  
357 indicating that A<sub>11</sub> is the most immuno-dominant domain capable of inducing robust antibody  
358 and T cell response. Although A<sub>11</sub> induced mixed Th1 and Th2 response, high levels IFN- $\gamma$   
359 may be correlated to strong activation of innate response, particularly innate B cells, which

360 require investigation<sup>68</sup>. The strong adaptive response induced by A<sub>11</sub> without any adjuvant  
361 highlights its immunomodulatory potential. It suggests that TLR4 dependent signaling by A<sub>11</sub>  
362 might activate strong innate and subsequent adaptive response leading to clearance of  
363 *Leptospira* from the host. We speculate that to evade this protective response, *Leptospira*  
364 might limit expression or undergo antigenic variation in LigA to avoid recognition with  
365 TLR4 and subsequent activation of the innate and adaptive response. However, this needs to  
366 be tested, and experiments are ongoing. Further, the inability of A $\Delta$ <sub>11</sub> to activate a strong  
367 innate and subsequent adaptive response is not due to misfolding, as mutant protein retains  
368 significant numbers of alpha-helix and beta sheets as revealed by structural analysis (sup Fig.  
369 2).

370 It is known that pathogenic *Leptospira* is resistant to the bactericidal activity of normal  
371 human serum (NHS)<sup>69,70</sup>. They can evade complement attack by using various strategies like  
372 recruitment of the host complement regulators, acquisition of host proteases or secretion of  
373 proteases that can cleave complement components on the bacterial surface and in its  
374 surroundings<sup>8</sup>. Several surface proteins of *Leptospira* like LenA, LenB, LcpA, Lsa30,  
375 including Lig proteins (LigA and LigB) have been shown to bind to various complement  
376 regulators<sup>20,25-30,42,43,71-74</sup>. Moreover, both conserved and the variable (N and C terminal)  
377 regions of LigA and LigB are involved in binding to FH and C4BP. Our results confirmed the  
378 previous report of binding of LAV with FH and PLG and identified and characterized the  
379 domain/s involved in binding and mediating subsequent co-factor or plasmin activity (Fig. 5).  
380 Additionally, the rescue of *E. coli* from complement-mediated killing in NHS pre-incubated  
381 with A<sub>11</sub> further substantiates the critical role of this domain in complement evasion<sup>75</sup>  
382 (Fig.5F). Thus, binding of FH and PLG to A<sub>11</sub> reflects the ability of *Leptospira* to utilize this  
383 domain for simultaneously inhibiting lectin and alternate pathway of complement-mediated  
384 killing (Fig. 5 and sup Fig.4). To our knowledge, this is the first report that demonstrates that  
385 a single domain of a surface protein is alone capable of recruiting FH and PLG directly from  
386 NHS and prevents complement activation.

387 Apart from killing bacterial pathogens by intracellular ROS and phagocytosis, neutrophils  
388 might release neutrophils extracellular traps (NETs) that capture and kill microbes in the  
389 extracellular space in tissues (at sites of infection) or within blood vessels<sup>17,76</sup>. This  
390 mechanism on killing extracellular bacteria by trapping outside the cell is independent of  
391 phagocytosis and degranulation<sup>17</sup>. Several bacterial pathogens, including *Staphylococcus*  
392 *aureus*, *Clostridium perfringens* and *Streptococcus pyogenes* have evolved sophisticated  
393 mechanisms to suppress, escape, and/or resist NETs through surface proteins having nuclease

394 activity<sup>77-79</sup>. Recently, it has been shown that *Leptospira* can induce the NET, and its surface  
395 protein LipL21 can modulate neutrophil function; however, nuclease capable of degrading  
396 NET has not been reported<sup>16,31</sup>. Our study discovered the nuclease (DNase) activity of LAV  
397 and demonstrated that A<sub>11</sub> primarily or predominantly mediates this activity as it was able to  
398 degrade DNA with the same propensity as LAV (Fig. 6). Our results further demonstrate that  
399 LAV or A<sub>11</sub> exhibits both endo and exonuclease activity. Although nuclease activity of LAV  
400 is not restricted to A<sub>11</sub>, as significant activity was also mediated by A<sub>13</sub> but our result clearly  
401 shows that it is primarily mediated by A<sub>11</sub>. The ability of LAV to degrade PMA induced NET  
402 in mouse neutrophils and highlights the possible role of LigA in escaping the bacteria from  
403 NETosis. To our knowledge, this is the first report of identification of nuclease activity of a  
404 surface protein in *Leptospira* and also demonstrating its diverse role in modulating the host  
405 innate response.

406 In conclusion, our results demonstrate that LigA is a multifunctional protein involved in  
407 attachment to host cells to initiate infection, a TLR4 agonist which can activate a strong  
408 innate response (possibly evading this TLR4 activation by antigen variation or  
409 downregulating its expression upon infection in the host), binds to complement regulators to  
410 evade complement-mediated killing and exhibit nuclease activity when *Leptospira* gets  
411 entrapped in NET (Fig. 7). These features might contribute to its successful colonization in a  
412 particular host. Interestingly, these functions are mediated primarily by a single domain (A<sub>11</sub>)  
413 which lies in LAV. This promising vaccine candidate conferred protective immunity against  
414 lethal infection in the hamster model of the disease. Thus, the protective efficacy of LAV  
415 based vaccine may be correlated with its ability to induce the robust antigen-specific humoral  
416 and T cell response that might lead to the generation of antibodies conceivably blocking  
417 binding to host extracellular matrix, acquiring complement regulators and inhibiting DNase  
418 activity all of these may aid in the clearance of bacteria from the host (Fig. 7). Our results  
419 provide important insight into the role of LAV in host-pathogen interaction and also  
420 established it as an immuno-modulator or adjuvant, which makes it an ideal candidate for  
421 developing vaccines for this dreadful zoonosis<sup>80</sup>.

422

## 423 **Material & Methods**

### 424 *Animals, cell lines and reagents*

425 Male C57BL/6J mice (6-8 weeks) were obtained from the Animal Resource and  
426 Experimental Facility of NIAB, Hyderabad. The original breeding colonies were obtained

427 from Jackson Labs, USA. The animals were maintained in a pathogen-free condition. All the  
428 procedures for animal experiments were approved by the Institutional Animal Ethics  
429 Committee (IAEC) and performed in accordance with the Committee for the Purpose of  
430 Control and Supervision of Experiments on Animals (CPCSEA) guidelines. RAW264.7 and  
431 HEK293 cell lines were originally purchased from the ATCC (Manassas, VA). Mouse  
432 macrophage WT (NR-9456), TLR2KO (TLR2<sup>-/-</sup>, NR-9457), TLR4KO (TLR4<sup>-/-</sup>, NR-9458),  
433 DKO (TLR2<sup>-/-</sup>/4<sup>-/-</sup>, NR-19975), TRIFKO (TRIF<sup>-/-</sup>, NR-9566), MyD88KO (MyD88<sup>-/-</sup>, NR-  
434 15633) and TMDKO (TRIF<sup>-/-</sup>-MyD88<sup>-/-</sup>, NR-15632), cell lines were obtained from BEI  
435 Resources, USA. Cells were cultured in DMEM (Sigma, USA) supplemented with 10% FBS  
436 (Invitrogen, Carlsbad, CA, USA), penicillin (100 U/ml), and streptomycin (100 µg/ml) and  
437 maintained at 37°C in a humidified incubator (5% CO<sub>2</sub>). Pharmacological inhibitors of NF-κB  
438 (SN50), p38 (SB203580), ERK (U0126) and JNK (SP600125) were purchased from  
439 Invivogen. Mouse IL-6 and TNF-α Sandwich ELISA kits were from R&D Biosystems. APC  
440 conjugated hamster antimouse-CD80, PE-conjugated rat antimouse-CD86, BV421 conjugated  
441 rat antimouse-CD40 and Per Cp Cy5.5 conjugated rat antimouse-MHC-II antibodies were  
442 procured from BD biosciences, US. Normal Human Serum (S1-100ml), Goat anti FH  
443 (SAB2500260), Mouse anti PLG (SAB1406263-50UG), Plasmin substrate, UPA (SRP6273)  
444 complement C3b (204860-250G) Complement factor I (C5938-1MG), Complement factor H  
445 (C5813-1MG), plasminogen (SRP6518-1MG) were procured from Sigma Chemical Co,  
446 USA. Polyclonal anti C3 was purchased from Complement Technology, USA.

447

#### 448 *Cloning, expression, and purification of recombinant proteins*

449 The Lig A variable (LAV) gene sequence was amplified by PCR from *L. interrogans* serovar  
450 Pomona strain genomic DNA using specific primers and then cloned in His-Sumo tagged  
451 pET28a expression vector. Domains of LAV 8 to 13 and corresponding deletion mutants  
452 (A $\Delta$ <sub>8</sub>-A $\Delta$ <sub>13</sub>) were similarly cloned in the pET28a vector. Various domain deletion mutants of  
453 LAV (A $\Delta$ <sub>8</sub>-A $\Delta$ <sub>13</sub>) were generated by PCR-based site-directed mutagenesis. All the clones  
454 were verified by sequencing. The plasmid was transformed into *BL21(DE3)* Rosetta. The  
455 resulting transformants were grown at 37°C overnight on LB broth containing 50µg/ml  
456 kanamycin, and the expression of the protein was induced with 1 mM isopropyl β-D-1-  
457 thiogalactoside (IPTG). The cells were harvested by centrifugation at 10,000 rpm, and the  
458 cell pellet was resuspended in 100mM Tris HCl, 150mM NaCl pH8.0, followed by sonication  
459 at constant pulses. The lysate was centrifuged to remove cell debris, and the supernatant was

460 subjected to affinity chromatography using Ni-NTA beads column (Takara). Eluted protein  
461 was dialyzed against 1×PBS with four changes for two days at 4°C. The protein was then  
462 passed through Detox- Gel (Pierce, USA) to remove any contaminating LPS from *E. coli*, and  
463 a residual trace amount of LPS was monitored by Limulus amoebocyte lysate (LAL,  
464 Endotoxin Detection Kit, Pierce, Thermo, USA) assay following the manufacturer's  
465 instructions. The purified protein was checked for size and purity by SDS-PAGE, and  
466 concentration was estimated using the Bradford reagent (Sigma, USA).

#### 467 *Cell stimulation assays by Cytokine ELISAs*

468 Cytokine ELISA kits (R&D systems) were used to measure cytokine levels, following the  
469 manufacturer's instructions. RAW264.7 cells were stimulated with LAV or (A<sub>8</sub>-A<sub>13</sub>) or  
470 corresponding deletion mutants (ΔA<sub>8</sub>-AΔ<sub>13</sub>) (2μg/ml), PAM3CSK4 (20ng/ml), and *E. coli*  
471 LPS 0111-B4 (500ng/ml) for 24h at 37°C in the presence of 5%CO<sub>2</sub> and cytokines (IL-6,  
472 TNF-α) were measured in the culture supernatant according to the manufacturer instructions.  
473 The proteins were pre-treated with Polymyxin B (20ng/mg protein) at 37°C for 1hr and  
474 proteinase K (5μg/mg protein) at 65°C for 1hr followed by inactivation at 95°C for 5min  
475 before each assay to rule out endotoxin activity. In a separate experiment wild type,  
476 TLR2KO, TLR4KO, DKO, MyD88KO, TRIFKO, TMDKO macrophage cell lines were  
477 stimulated with PAM3CSK4, LPS, LAV or A<sub>11</sub> or AΔ<sub>11</sub> for 24h at 37°C/5%CO<sub>2</sub> and  
478 cytokines (IL-6, TNF-α) in the culture supernatant were measured by ELISA kit as per  
479 manufacturer's instructions. HEK-293T cells were cultured in a complete DMEM medium  
480 for 24h at 37°C in the presence of 5%CO<sub>2</sub> and transfected with TLR2, TLR4, and NF-kB  
481 reporter plasmids using X-fect Transfection reagent (Takara, Japan) following manufacturer's  
482 protocol. Cells were stimulated with LAV (2μg/ml) for 24h, and then IL-8 levels were  
483 measured in the cell culture supernatant. To assess the signaling pathway involved, additional  
484 experiments were done in which RAW264.7 cells were pre-treated for 30min at 37°C/5%CO<sub>2</sub>  
485 with pharmacological inhibitors of NF-kB (SN50; 20μM) or JNK (SP600125; 40μM) or  
486 p38MAPK (SB203580; 30μM) or ERK (U0126; 20μM) followed by treatment with A<sub>11</sub>  
487 (2μg/ml) for 24h at 37°C in the presence of 5%CO<sub>2</sub>. Cytokine levels were measured by  
488 ELISA kit.

#### 489 *Flow cytometric analysis*

490 RAW264.7 cells were incubated in 6-well plates (0.3×10<sup>6</sup> cells/well) with PAM3CSK4  
491 (20ng/ml), LPS (500ng/ml), LAV or A<sub>11</sub> or AΔ<sub>11</sub> (2μg/ml) for 24h at 37°C in the presence of  
492 5%CO<sub>2</sub>. Cells were harvested and washed with pre-chilled PBS and then incubated on ice for

493 1h in the dark with respective fluorochrome conjugated antibodies against CD80, CD86,  
494 MHC-II, and CD40. Cells were washed and then fixed with 1% paraformaldehyde, and  
495 50,000 total events/sample were acquired using a BD Fortessa. The data were analyzed using  
496 FlowJo software.

#### 497 *Preparation of antisera*

498 Male C57BL/6J mice (6-8 weeks) were immunized subcutaneously on days 0 with 20 $\mu$ g of  
499 LAV, A<sub>11</sub>, A $\Delta$ <sub>11</sub> in complete Freund's adjuvant (CFA) and then boosted on day 21 with 10 $\mu$ g  
500 of proteins in Incomplete Freund's adjuvant (IFA). Sera were collected one week after  
501 booster (day 28) and titer were determined using ELISA. The mouse serum having anti-LAV,  
502 anti-A<sub>11</sub> or anti-A $\Delta$ <sub>11</sub> antibodies were used in confocal microscopy.

#### 503 *TLR binding assay*

504 WT, TLR2KO, TLR4KO and DKO cell lines were grown overnight on glass-bottom cell  
505 imaging dishes (Eppendorf) and then incubated for 30 min at 37°C in the presence of 5%CO<sub>2</sub>  
506 with LAV or A<sub>11</sub> or A $\Delta$ <sub>11</sub> (2 $\mu$ g/ml) in DMEM without FBS. The cells were washed with PBS  
507 and fixed for 15 min using 4% paraformaldehyde followed by blocking with 5%FBS in PBS  
508 for 30min at RT. The cells were then incubated with anti-LAV or A<sub>11</sub> or A $\Delta$ <sub>11</sub> (mouse serum,  
509 1:100 dilution) for 1h, washed three times with PBS, and then stained with Alexa Flour 647  
510 conjugated rabbit anti-mouse IgG (Biolegend, USA). Cells were extensively washed and  
511 mounted with VECTA SHIELD (containing DAPI) mounting medium and observed using a  
512 63x oil objective on a confocal microscope (Leica SP8, Wetzlar, Germany).

#### 513 *RT-PCR*

514 WT, TLR2KO, TLR4KO and DKO mouse macrophage cell lines were treated with A<sub>11</sub>  
515 (2 $\mu$ g/ml), LPS (500ng/ml) or PAM3CSK4 (20ng/ml). After 4, 24 and 48h of treatment cells  
516 were recovered in 500 $\mu$ l of TRIzol (Invitrogen, Carlsbad, CA), and equal volumes of  
517 chloroform were added; samples were centrifuged at 12000 $\square$ rpm for 15 $\square$ min at 4°C. The  
518 aqueous phase was then passed through RNA easy mini columns (MN) and RNA was  
519 purified following the manufacturer's protocol. RNA quality was checked by running on a  
520 Formaldehyde gel for 18s and 28s RNA bands and analyzed on Bioanalyser. The RNA  
521 quantity was assessed by UV spectroscopy and purity by 260/280 ratio. First-strand cDNA  
522 was synthesized using the superscript III-RT system (Invitrogen) following the  
523 manufacturer's instructions. RT-PCR was performed in 96 well microtiter plates in a 10 $\mu$ l



524 reaction volume containing 50ng cDNA, 10 $\mu$ M each primer (Table 1) and SYBR green (Bio-  
525 Rad). Samples were run in triplicate, and data was analyzed with Sequence Detection System  
526 (Bio-Rad CFX-96). The experimental data were presented as fold changes of gene expression  
527 of stimulated cells at various time points relative to control. mRNA levels of the analyzed  
528 genes were normalized to the amount of GAPDH present in each sample.

### 529 *Circular Dichroism*

530 The proteins (LAV and A $\Delta_{11}$ ) were dialysed against sodium phosphate buffer and the CD  
531 spectroscopy of the far-UV spectrum was obtained in a Jasco J-810 spectropolarimeter (Japan  
532 Spectroscopic). The resulting spectra are presented as the averages of three scans recorded  
533 from 190 to 260 nm. The residual molar ellipticity is expressed in degree cm<sup>2</sup> dmol<sup>-1</sup>.  
534 Spectral data were analyzed with the software BESTSEL ( <https://bestsel.elte.hu/>) for  
535 estimation of the secondary structure content.

### 536 *Adaptive immune response*

537 Male C57BL/6J mice (6-8 weeks) were immunized subcutaneously on days 0 with 20 $\mu$ g and  
538 on day 21 with 10 $\mu$ g of LAV or A<sub>11</sub> with or without Alum adjuvant. Animals vaccinated with  
539 PBS were used as control. Mice bled at various time points a (day 0, 21 and 28), and the  
540 serum was analyzed for antigen-specific antibodies. Animals were euthanized on day 28 and  
541 blood, and spleens were collected for evaluation of antigen-specific immune responses. To  
542 determine antibody response, serum samples from individual mice were collected on the day  
543 before immunization and then on day 21 and 28. Total IgG, IgG1, IgG2a, and IgA  
544 concentrations were evaluated using ELISA using the standard procedure. For cell  
545 proliferation assay, splenocytes prepared from different mice groups were stimulated with  
546 varying concentrations (1, 2 and 10  $\mu$ g/ml) of LAV or A<sub>11</sub> or A $\Delta_{11}$ . Cells were counted  
547 under an inverted microscope at 24h, 48h and 72h post-stimulation. To determine Th1 and  
548 Th2 cytokines, culture supernatant was collected at 48-72h post antigen stimulation and were  
549 used to estimate the IL-4, IL-10 and IFN- $\gamma$  using cytokine ELISA kits (R&D systems)  
550 following the manufacturer's instructions.

### 551 *Dot Blot binding Assay:*

552 Dot blot binding assays were performed to confirm the binding of various LAV domains (A<sub>8</sub>-  
553 A<sub>13</sub>) and their single domain deletion mutants (A $\Delta_8$ -A $\Delta_{13}$ ) with FH and serine protease PLG.  
554 1 $\mu$ g of each protein (wild type, single domain, and domain deletion mutant) was immobilized  
555 onto NC membranes (0.2 $\mu$  pore size; Bio-Rad). The membranes were kept for drying for 5-  
556 10 min at RT. The membranes were then blocked with 5% BSA in Tris-buffered Saline-

557 Tween 20 (TBS-T) for 2h at RT, washed three times with TBS-T, and incubated with 1%  
558 normal human serum (NHS) diluted in PBS with gentle shaking for 3h at RT. After extensive  
559 washing with TBS-T, the membranes were incubated with the corresponding primary  
560 antibody (Goat anti-FH, Mouse anti-PLG 1: 10,000 dilution) in TBS-T for 2h at RT. The  
561 membranes were then washed with TBS-T and incubated with a respective peroxidase-  
562 conjugated secondary antibody (1: 6,000) for 2h at room temperature. Reactive spots were  
563 developed using a chemiluminescence system with an exposure time of 10 sec.

#### 564 *Pull down assay*

565 Each domain deletion mutants of LAV ( $A\Delta_8$ - $A\Delta_{13}$ ) along with 10% heat-inactivated NHS,  
566 were incubated with 15  $\mu$ L of Ni-NTA agarose beads (Takara) overnight at 4°C. Agarose  
567 beads were washed five times with PBS containing 40mM imidazole and then interacting  
568 proteins were eluted with PBS containing 250 mM imidazole. Each elutes boiled in reducing  
569 Laemmli buffer and subjected to SDS-PAGE. The proteins were transferred to nitrocellulose  
570 membrane followed by western blot against Anti- FH, and Anti-PLG, respectively.

#### 571 *ELISA binding assay:*

572 Protein binding to soluble complement regulators FH, C4BP and PLG were analysed by  
573 ELISA as described previously<sup>27,29</sup>. Briefly, micro titre plates were coated overnight at 4°C  
574 with 1 $\mu$ g of domains ( $A_8$ - $A_{13}$ ) and their single domain deletion mutants ( $A\Delta_8$ - $A\Delta_{13}$ ). BSA  
575 and LAV were used as positive and negative control. The wells were washed three times with  
576 PBS containing 0.05 % Tween 20 (PBS-T), blocked with 300 $\mu$ l PBS/3 % BSA for 2h at  
577 37°C, and incubated with 100 $\mu$ l 10 %NHS for 90 min at 37°C. After washing with PBST,  
578 goat anti-FH (1:1000), rabbit anti-C4BP (1:1000) or mouse anti-PLG (1:5000) was added and  
579 the plate was incubated for 1h at 37°C. After washing, HRP-conjugated anti-goat or anti-  
580 mouse or anti-rabbit IgG was added and incubated for 1h at 37°C. The wells were washed  
581 and TMB substrate was added (100 $\mu$ l/well). The reaction was stopped by the addition of 50 $\mu$ l  
582 2N  $H_2SO_4$  and absorbance was measured at 450nm in a microplate reader.

#### 583 *Cofactor activity assay:*

584 Cofactor activity was determined as described previously<sup>29</sup>. Briefly, 2 $\mu$ g of  $A_{11}$ ,  $A\Delta_{11}$  and  
585 LAV (positive control) or BSA (negative control) were coated on microplates overnight at  
586 4°C. The wells were washed and blocked with PBS/2 % BSA for 2h at 37°C, followed by the  
587 addition of 2 $\mu$ g pure FH and further incubation for 90 min at 37°C. Unbounded FH was  
588 removed by washing and then 250ng FI and 500ng C3b were added to the microtiter plate  
589 wells and incubated for 3-5h at 37°C. The supernatants were loaded onto a 10% SDS-PAGE

590 gel and transferred onto a 0.22 $\mu$  PVDF membrane. For the immunoblotting, membranes were  
591 blocked with 5 % BSA and then incubated with goat anti-human C3 (1:5000) for 2h at RT.  
592 After the usual steps of washing, the membranes were incubated with a peroxidase-  
593 conjugated secondary antibody. The images were visualized under the Clarity Max Western  
594 ECL substrate (BIO-RAD) using Syngene G: BOX Chemi XX6/XX9.

#### 595 *Plasmin activity assay:*

596 Plasmin activity was determined as described previously<sup>29</sup>. Briefly, Microtiter plate wells  
597 were coated overnight at 4°C with 2 $\mu$ g LAV (positive control), BSA (negative control), A<sub>11</sub>,  
598 A $\Delta$ <sub>11</sub>. The plate was washed with PBS-T and blocked for 2h at 37°C with 10% skim milk.  
599 After discarding the blocking solution, human PLG (2 $\mu$ g/well) was added, followed by  
600 incubation for 90 min at 37°C. After washing plates three times with PBS-T, 250 $\mu$ g/ml uPA  
601 was added with the plasmin-specific substrate, *D*-Val-Leu-Lys 4-*p*-nitroanilide  
602 dihydrochloride (100 $\mu$ l/well) at a final concentration of 0.4mM in PBS. Plates were  
603 incubated for 24h at 37°C, and absorbances were measured at 405nm using a microplate  
604 reader.

#### 605 *Bactericidal assay*

606 Bactericidal activity was determined as described elsewhere<sup>29</sup>. 1.3 $\times$ 10<sup>8</sup> *E Coli* (*BL21DE3*)  
607 cells were washed once with PBS and incubated with 10% NHS with or without pre-  
608 incubation with recombinant proteins (A<sub>11</sub>, A $\Delta$ <sub>11</sub>, LAV at 20 $\mu$ g/ ml) in a final reaction  
609 volume of 100 $\mu$ l for 30 min at 37°C. The samples were placed on ice to stop further  
610 bacteriolysis and then plated on LB agar plates. The plates were incubated at 37°C overnight.  
611 Survival was determined by counting bacterial colonies the following day.

#### 612 *Nuclease activity*

613 To examine the DNase activity of LAV, 200ng of 700bp DNA was incubated with different  
614 concentration (1 or 2 or 5 or 10 $\mu$ g) of LAV or 2 $\mu$ g domains (A<sub>8</sub>-A<sub>13</sub>) and 2 $\mu$ g domain  
615 deletion mutants (A $\Delta$ <sub>8</sub>-A $\Delta$ <sub>13</sub>) or DNase I (20IU, positive control) in DPBS with 5mM MgCl<sub>2</sub>  
616 in a PCR tube at 37°C for 2h. The reaction mixture was subjected to EtBr Agarose gel  
617 electrophoresis (1%) and then observed under the Gel doc. In a separate experiment, a  
618 plasmid was used as a substrate to check endonuclease activity of various concentrations (  
619 2 $\mu$ g, 5 $\mu$ g, and 10 $\mu$ g) of rLAV or rA $\Delta$ <sub>11</sub>. EDTA is a nuclease activity inhibitor, was used as  
620 control.

621

#### 622 *Isolation of Neutrophils from murine bone marrow*

623 Neutrophils were isolated from the bone marrow of C57BL/6J mice using the standard  
624 procedure<sup>44</sup>. Briefly, bone marrow was flushed from femurs using a 26G needle, passed  
625 through a 30 $\mu$ m cell strainer, and then cells were washed in complete RPMI-1640 twice at  
626 1,400 rpm for 10 min at 4°C. After lysis of RBCs using ACK lysis buffer, cells were washed  
627 with RPMI-1640 supplemented with 10% FBS, counted, and resuspended in 1ml of ice-cold  
628 sterile PBS. Next, cells were overlaid on 3ml of Histopaque 1077/1119 mix in a 15ml conical  
629 tube and then centrifuged for 30min at 2,000 rpm at 25°C without braking. Neutrophils at the  
630 interface were collected and washed twice with a complete RPMI-1640 medium, counted and  
631 suspended in the medium for the specific assay. The viability was determined by Trypan  
632 blue exclusion assay.

### 633 *NET assay*

634  $2 \times 10^5$  freshly isolated neutrophils in 300 $\mu$ l medium were added to the imaging dish and kept  
635 at 37°C in the presence of 5%CO<sub>2</sub> overnight. Cells were treated with 3 $\mu$ l of DMSO or PMA  
636 (50ng/ml) or LPS (100ng/ml) and further incubated for 3h at 37°C/5%CO<sub>2</sub>. Cells were  
637 washed thrice with DPBS and then incubated with LAV (2 $\mu$ g/ml) or DNase-I (20IU) or BSA  
638 (5 $\mu$ g/ml) in 5mM MgCl<sub>2</sub> containing PBS for 2h at 37°C/5%CO<sub>2</sub>. Cells were washed with  
639 DPBS, fixed with 4% PFA (15min at RT), and then stained with Rat anti-mouse Ly6G  
640 (Alexa flour 647) for 30min. Cells were washed thoroughly with DPBS, mounted with  
641 VECTA SHIELD (with DAPI) mounting medium and observed using a 63x oil objective on a  
642 confocal microscope (Leica SP8, Wetzlar, Germany).

### 643 *Statistical Analysis*

644 For all the experiments, wherever required one way or two-way ANOVA were executed to  
645 analyze the results. The data were represented as the mean of triplicates  $\bar{x} \pm \text{SEM}$ .  
646  $p < 0.05$  was considered significant.

647

### 648 **Data Availability**

649 The data that support the findings of this study are available from the corresponding author  
650 upon reasonable request.

651

652

653

654

655

656

657

658

659

660

661

662

663

## 664 **Legends to Figures**

### 665 **Fig.1: Variable region of LigA (LAV) induced TLR4 dependent activation of mouse** 666 **macrophages.**

667 (A) *Screening of pro-inflammatory response of LAV in RAW264.7 cells.* RAW264.7 cell  
668 lines were stimulated with LAV in varying concentrations 1 or 2 or 5µg/ml along with PMB  
669 for 24h and supernatant was collected to measure levels of TNF-α and IL-6 cytokines by  
670 using ELISA. (B) *Binding of LAV with TLR4.* WT, TLR2KO, TLR4KO, or DKO  
671 macrophages were incubated with LAV (2µg/ml) for 30 min. After washing, cells were fixed  
672 and stained with then stained with Alexa Flour 647 conjugated rabbit anti-mouse IgG and  
673 analysed by the confocal microscope as described in materials and methods. (C) *Pro-*  
674 *inflammatory response of mouse macrophages stimulated with rLig proteins.* WT, TLR2KO,  
675 TLR4KO and DKO macrophages cell lines were treated LAV at 2µg/ml for 24h at 37°C in  
676 presence of 5%CO<sub>2</sub> and levels of IL-6 and TNF-α in the supernatants were measured by  
677 ELISA. (D) *IL-8 response in HEK293-TLR4 cells stimulated with LAV.* HEK293T cells  
678 transfected with TLR2, TLR4 and NF-kB reporter plasmids were stimulated with rLAV  
679 (2µg/ml) for 24h and IL-8 was measured in the culture supernatant by ELISA. *E. coli* LPS  
680 (500ng/ml) or PAM3CSK4(20ng/ml) as TLR4 and TLR2 ligands respectively were used as  
681 positive controls in all experiments wherever indicated. Data are representative of three  
682 different experiments. Significant differences were calculated using the one or two way  
683 ANOVA(\*\*\*\*, \*\*\*, \*\*, \* indicates P < 0.0001, < 0.001, P < 0.01 and P < 0.05  
684 respectively).

685

### 686 **Fig.2: 11<sup>th</sup> domain of LigA (A<sub>11</sub>) is involved in binding to TLR4 and subsequent** 687 **signalling leading to activation and maturation of mouse macrophages**

688 (A) *Screening of pro-inflammatory response of individual domains of LAV in RAW264.7 cells*  
689 RAW264.7 cells were incubated with individual domains (A<sub>8</sub>-A<sub>13</sub>) at concentration of 2µg/ml  
690 pre-treated with Polymixin B for 24h at 37°C in presence of 5%CO<sub>2</sub> and supernatant was  
691 collected to measure levels of IL-6 and TNF-α by ELISA. (B) *Screening of pro-inflammatory*  
692 *response of domain deletion mutants of LAV in RAW264.7 cells.* RAW264.7 cells were  
693 stimulated with LAV or corresponding deletion mutants (A<sub>8</sub>Δ-A<sub>13</sub>Δ) at a concentration of  
694 2µg/ml pre-treated with Polymixin B for 24h at 37°C in the presence of 5%CO<sub>2</sub> and  
695 supernatant was collected to measure levels of IL-6 and TNF-α by ELISA. (C) *Binding of A<sub>11</sub>*

696 *with the mouse TLR4*. WT, TLR2KO, TLR4KO or DKO macrophages cell lines were  
697 incubated with A<sub>11</sub> and A<sub>Δ11</sub> (2μg/ml) for 30 min. After washing, cells were fixed and  
698 stained with respective antibodies and analysed by confocal microscope as described in  
699 materials and methods. **(D)** *The pro-inflammatory response of mouse macrophages*  
700 *stimulated with A<sub>11</sub>*. WT, TLR2KO, TLR4KO and DKO bone marrow-derived macrophages  
701 cell lines were treated with LAV, A<sub>11</sub>, A<sub>Δ11</sub> (2μg/ml), LPS (500ng/ml) or  
702 PAM3CSK4(20ng/ml) for 24h at 37°C in presence of 5%CO<sub>2</sub> and levels of IL-6 and TNF-α  
703 in the supernatants were measured with ELISA. **(E)** *A<sub>11</sub> enhanced the expression of surface*  
704 *markers in mouse macrophages*. RAW264.7 cells were incubated with LPS (500 ng/ml) or  
705 PAM3CSK (20ng/ml) or LAV or A<sub>11</sub> or A<sub>Δ11</sub> (2μg/ml) for 24h at 37°C in presence of  
706 5%CO<sub>2</sub>. Cells were stained with fluorochrome-conjugated antibodies and then analyzed by  
707 Flow cytometry as described in materials and methods. Control indicates uninduced or  
708 unstimulated cells, *E. coli* LPS (500ng/ml) or PAM3CSK4(20ng/ml) as TLR4 and TLR2  
709 ligands respectively were used as positive controls in all experiments wherever indicated.  
710 Data are representative of three different experiments. Significant differences were calculated  
711 using the one or two way ANOVA(\*\*\*\*, \*\*\*, \*\*, \* indicates P < 0.0001, < 0.001, P < 0.01  
712 and P < 0.05 respectively).

713

714 **Fig.3: 11<sup>th</sup> domain of LigA (A<sub>11</sub>) produces pro-inflammatory cytokines via signalling**  
715 **through MAP kinase involving p38 and JNK pathway**

716 **(A)** *A<sub>11</sub> signals through TLR4 involving the MyD88 adapter*. WT, MyD88 KO, TRIF KO and  
717 TMDKO bone marrow-derived macrophages cell lines were treated with LAV or A<sub>11</sub> or A<sub>Δ11</sub>  
718 (2μg/ml) for 24h at 37°C in the presence of 5%CO<sub>2</sub> and levels of IL-6 and TNF-α in the  
719 supernatants were measured by ELISA. **(B)** *A<sub>11</sub> signals through TLR4 via the MAP kinase*  
720 *pathway involving p38 and NFκB*. WT or TLR2KO or TLR4KO or DKO macrophages cell  
721 lines were stimulated with A<sub>11</sub> (2μg/ml) for 24h at 37°C in the presence of 5%CO<sub>2</sub>. Levels of  
722 phosphorylated p38, JNK, and ERK1/2 induced by A<sub>11</sub> were analyzed by western blot as  
723 described in materials and methods. **(C)** *Pharmacological inhibitors of p38 and NFκB*  
724 *significantly reduces A<sub>11</sub> mediated cytokine response*. RAW 264.7 cells were pre-treated for  
725 30min with NF-κB inhibitor (SN50; 20μM), JNK inhibitor (SP600125; 40μM) or p38MAPK  
726 inhibitor (SB203580; 30μM) or ERK (U0126; 50μM) or all four inhibitors together and then  
727 stimulated with A<sub>11</sub> (2μg/ml) for 24h at 37°C in the presence of 5%CO<sub>2</sub> and supernatant was  
728 collected to measure levels of IL-6 and TNF-α by ELISA. **(D)** *Analysis of expression of*  
729 *immune response-related genes in mouse macrophages stimulated with A<sub>11</sub>*. WT, TLR2KO,  
730 TLR4KO and DKO mouse macrophage cell lines were treated with 2μg/ml A<sub>11</sub> for 4h or 24h  
731 or 48h. Cells were recovered, RNA was isolated, converted to cDNA and gene expression  
732 was analyzed by RT-PCR as described in material and methods. The data were presented as  
733 fold changes between stimulated cells vs control and normalized to GAPDH. *E. coli* LPS  
734 (500ng/ml) or PAM3CSK4(20ng/ml) as TLR4 and TLR2 ligands respectively were used as  
735 positive controls in all experiments wherever indicated. All data are representative of three  
736 independent experiments. Significant differences were calculated using the one or two way  
737 ANOVA(\*\*\*\*, \*\*\*, \*\*, \* indicates P < 0.0001, < 0.001, P < 0.01 and P < 0.05  
738 respectively).

739

740

741 **Fig.4: A<sub>11</sub> is an immuno-dominant domain that induces robust antibody and T cell**  
742 **response in mice**

743 (A) *Antibody response*. The antibody response (Total IgG, IgG1, IgG2c and IgA) on day 28  
744 in various immunized groups (PBS, A<sub>11</sub>, A<sub>11</sub>-Alum) was evaluated by ELISA as described in  
745 materials and methods. (B) *Lymphocyte proliferation*. The proliferation of splenocytes  
746 isolated from various groups was analyzed by stimulating with recall antigen (A<sub>11</sub>) and  
747 counting cells after 72h. (C) *Cytokine analysis*. Culture supernatant from splenocytes  
748 stimulated with A<sub>11</sub> for 72h were analyzed for IL-4, IL-10 and IFN- $\gamma$  by using a sandwich  
749 ELISA kit following manufacturer's instructions. (D) *Total IgG response at day 28 in*  
750 *animals immunized with LAV, A<sub>11</sub>, and A $\Delta$ <sub>11</sub> in Freund's adjuvant*. Total IgG at day 28 was  
751 analysed in serum from animals immunized LAV, A<sub>11</sub> and A $\Delta$ <sub>11</sub> in Freund's adjuvant by  
752 ELISA as described above. (E) *Antibody response against A<sub>11</sub> and A $\Delta$ <sub>11</sub> in serum of animals*  
753 *immunized with LAV-Alum*. Total IgG was analyzed in serum from LAV immunized animals  
754 (diluted at 1:10000 and 1:100000) against A<sub>11</sub> and A $\Delta$ <sub>11</sub> by ELISA as described above (F)  
755 *Cell proliferation* and (G) *Cytokine analysis of lymphocytes isolated from LAV-Alum*  
756 *immunized animals after in-vitro stimulation with A<sub>11</sub> and A $\Delta$ <sub>11</sub>*. Lymphocytes isolated at day  
757 28 from animals immunized with LAV-Alum were stimulated with A<sub>11</sub> and A $\Delta$ <sub>11</sub> for 48-72h  
758 and analysed for proliferation and cytokines in the culture supernatant were determined as  
759 described above. All data are representative of three independent experiments. Significant  
760 differences were calculated using the one or two way ANOVA(\*\*\*\*, \*\*\*, \*\*, \* indicates P <  
761 0.0001, < 0.001, P < 0.01 and P  $\leq$  0.05 respectively).  
762

763

764 **Fig.5: Characterization of the domain of LAV involved in evasion from complement-**  
765 **mediated killing**

766 (A) *Binding of LAV domains as analyzed by Dot blot*. Purified proteins LAV (positive  
767 control), BSA (negative control), individual domains (A<sub>8</sub>-A<sub>13</sub>), and corresponding deletion  
768 mutants (A $\Delta$ <sub>8</sub>-A $\Delta$ <sub>13</sub>) were immobilized on nitrocellulose membranes and then incubated with  
769 1% NHS (as a source of FH and PLG). FH and PLG were detected with specific antibodies  
770 by Western blot. (D) *Binding of LAV deletion mutants as analysed by Pull down assay*. Bead  
771 bound LAV deletion mutants(A $\Delta$ <sub>8</sub>-A $\Delta$ <sub>13</sub>) were incubated with 10% HI NHS and protein –  
772 protein interaction was detected by western blot using Anti FH (157 kDa) or PLG antibody  
773 (45 kDa) as described in methodology (C) *Binding of LAV domains as analyzed by ELISA*.  
774 Microtiter plates were coated with 1 $\mu$ g of proteins LAV, domains (A<sub>8</sub>-A<sub>13</sub>), and  
775 corresponding deletion mutants (A $\Delta$ <sub>8</sub>-A $\Delta$ <sub>13</sub>) and 10% HI-NHS was added to each well. The  
776 binding was detected with specific antibodies against FH and PLG as described in materials  
777 and methods. (D) *Co-factor activity*. LAV, A<sub>11</sub>, A $\Delta$ <sub>11</sub> (2 $\mu$ g/ml), and BSA (2 $\mu$ g/well) were  
778 immobilized on microtiter plates and incubated with purified FH. After washing, C3b and  
779 factor I (FI) were added, and the plate was incubated for 4h at 37°C. The products were  
780 analysed by SDS-PAGE, and the cleavage fragments of C3b was detected by Western blot  
781 using anti-human C3 polyclonal antibodies as described in materials and methods. (E)  
782 *Plasmin activity*. LAV, A<sub>11</sub>, A $\Delta$ <sub>11</sub> (2 $\mu$ g/ml), and BSA (2 $\mu$ g/well) were immobilized on  
783 microtiter plates followed by the addition of PLG, uPA, and specific plasmin substrate. The  
784 plate was incubated for 48h, and absorbance was read at 405nm as described in materials and  
785 methods. In another experiment, C3b was incubated with activated plasmin in the presence or  
786 absence of A<sub>11</sub> and cleavage products were visualized using Western blot. (F) *Bactericidal*  
787 *assay*. 1.3  $\times$  10<sup>8</sup> *E Coli BL-21(DE3)* cells were incubated with 10% NHS with or without  
788 pre-incubation with A<sub>11</sub> or A $\Delta$ <sub>11</sub> or LAV at 20 $\mu$ g/ml for 30 min at 37°C. The samples  
789 were plated on LB agar plates and incubated at 37°C overnight. Survival was determined by  
790 counting bacterial colonies the following day. All data are representative of three independent

791 experiments. Significant differences were calculated using the one or two way  
792 ANOVA(\*\*\*\*, \*\*\*, \*\*, \* indicates  $P < 0.0001$ ,  $< 0.001$ ,  $P < 0.01$  and  $P < 0.05$   
793 respectively).

794

795

796 **Fig.6: LAV is nuclease capable of degrading Neutrophil Extracellular Trap (NET)**  
797 **(A) Exonuclease activity of the LAV.** 700bp DNA (200ng) was incubated with different  
798 concentrations of LAV (2, 5 and 10 $\mu$ g) in DPBS with 5mM MgCl<sub>2</sub> at 37°C for 3h followed  
799 by visualized using the Agarose gel electrophoresis.**(B) Endonuclease activity of the LAV.**  
800 Plasmid DNA (200ng) was incubated with different concentrations of LAV (2, 5 and 10 $\mu$ g)  
801 in DPBS with 5mM MgCl<sub>2</sub> at 37°C for 3h followed by visualized using the Agarose gel  
802 electrophoresis. **(C) Exonuclease activity of the LAV domains.** 700bp DNA (200ng) with  
803 incubated with various LAV domains (A<sub>8</sub>-A<sub>13</sub>) at 5 $\mu$ g in DPBS with 5mM MgCl<sub>2</sub> incubated  
804 at 37°C for 3h followed by EtBr- Agarose gel electrophoresis. **(D) Exonuclease activity of**  
805 **domain deletion mutants of LAV.** DNA (200ng) with incubated with various domain deletion  
806 mutants of LAV (A $\Delta$ <sub>8</sub>-A $\Delta$ <sub>13</sub>) at 5 $\mu$ g in DPBS with 5mM MgCl<sub>2</sub> incubated at 37°C for 3h  
807 followed by EtBr- Agarose gel electrophoresis **(E) Endonuclease activity of the A $\Delta$ <sub>11</sub>.**  
808 Plasmid DNA (200ng) was incubated with different concentrations of A $\Delta$ <sub>11</sub> (2, 5 and 10 $\mu$ g) in  
809 DPBS with 5mM MgCl<sub>2</sub> with or without EDTA at 37°C for 3h followed by visualized using  
810 the Agarose gel electrophoresis. C and C1 indicates DNA alone, D indicatres DNA treated  
811 with DNase, C2 indicates DNA with reaction mixture, M is 100bp or 1kb DNA ladder in all  
812 experiments wherever indicated **(F). NETosis assay:** Mouse Neutrophils were cultured on  
813 glass coverslips stimulated with DMSO or LPS (500ng) or PMA (0.5 $\mu$ M) for 3.5h and then  
814 treated with DNase-I (positive control) or BSA (negative control) or LAV (5 $\mu$ g) for 2h at  
815 37°C and visualized under 63X of Leica microscopy. DAPI; staining of the complete DNA  
816 content (Nuclear and released), Ly6G; neutrophil marker, BF; Bright field. All data are  
817 representative of three independent experiments.

818

819 **Fig.7. Schematic presentation of the role of LigA in the modulation of host immune**  
820 **response. (A) Immune evasion.** LigA expressed during infection might acquire complement  
821 regulators (FH, C4BP, PLG) to inhibit both the classical and alternate pathways of  
822 complement-mediated killing. *Leptospira* might utilize the nuclease activity of LigA to  
823 escape from NET. Upon interaction with host innate immune cells (DCs, macrophages),  
824 LigA might undergo antigenic variation or downregulate its expression to evade recognition  
825 through TLR4 and subsequent activation of the innate response. **(B) Immune activation.**  
826 LigA (LAV) can activate strong innate and adaptive immune responses leading to the  
827 production of antibodies that may block binding to complement regulators, inhibit nuclease  
828 activity and enhance phagocytosis, all of which may contribute to the killing of bacteria and  
829 clearance from the host.

830

831

832

833



834

835

836

837

838

839

840

841

842

843

844

845

846

847 **References**

848

849 1 Costa, F. *et al.* Global Morbidity and Mortality of Leptospirosis: A Systematic  
850 Review. *PLoS neglected tropical diseases* **9**, e0003898,  
851 doi:10.1371/journal.pntd.0003898 (2015).

852 2 Goarant, C. Leptospirosis: risk factors and management challenges in developing  
853 countries. *Research and reports in tropical medicine* **7**, 49-62,  
854 doi:10.2147/RRTM.S102543 (2016).

855 3 Grassmann, A. A., Souza, J. D. & McBride, A. J. A Universal Vaccine against  
856 Leptospirosis: Are We Going in the Right Direction? *Frontiers in immunology* **8**, 256,  
857 doi:10.3389/fimmu.2017.00256 (2017).

858 4 Medzhitov, R. & Janeway, C., Jr. Innate immune recognition: mechanisms and  
859 pathways. *Immunological reviews* **173**, 89-97, doi:10.1034/j.1600-  
860 065x.2000.917309.x (2000).

861 5 Medzhitov, R. & Janeway, C., Jr. The Toll receptor family and microbial recognition.  
862 *Trends in microbiology* **8**, 452-456, doi:10.1016/s0966-842x(00)01845-x (2000).

863 6 Pasare, C. & Medzhitov, R. Toll-like receptors: linking innate and adaptive immunity.  
864 *Advances in experimental medicine and biology* **560**, 11-18, doi:10.1007/0-387-  
865 24180-9\_2 (2005).

866 7 Wille-Reece, U. *et al.* Toll-like receptor agonists influence the magnitude and quality  
867 of memory T cell responses after prime-boost immunization in nonhuman primates.  
868 *The Journal of experimental medicine* **203**, 1249-1258, doi:10.1084/jem.20052433  
869 (2006).

870 8 Zipfel, P. F., Wurzner, R. & Skerka, C. Complement evasion of pathogens: common  
871 strategies are shared by diverse organisms. *Molecular immunology* **44**, 3850-3857,  
872 doi:10.1016/j.molimm.2007.06.149 (2007).

- 873 9 Schmidt, C. Q., Lambris, J. D. & Ricklin, D. Protection of host cells by complement  
874 regulators. *Immunological reviews* **274**, 152-171, doi:10.1111/imr.12475 (2016).
- 875 10 Barthel, D., Schindler, S. & Zipfel, P. F. Plasminogen is a complement inhibitor. *The*  
876 *Journal of biological chemistry* **287**, 18831-18842, doi:10.1074/jbc.M111.323287  
877 (2012).
- 878 11 Urban, C. F., Lourido, S. & Zychlinsky, A. How do microbes evade neutrophil  
879 killing? *Cellular microbiology* **8**, 1687-1696, doi:10.1111/j.1462-5822.2006.00792.x  
880 (2006).
- 881 12 Christodoulides, A., Boyadjian, A. & Kelesidis, T. Spirochetal Lipoproteins and  
882 Immune Evasion. *Frontiers in immunology* **8**, 364, doi:10.3389/fimmu.2017.00364  
883 (2017).
- 884 13 Cox, D. L., Chang, P., McDowall, A. W. & Radolf, J. D. The outer membrane, not a  
885 coat of host proteins, limits antigenicity of virulent *Treponema pallidum*. *Infection*  
886 *and immunity* **60**, 1076-1083, doi:10.1128/IAI.60.3.1076-1083.1992 (1992).
- 887 14 Zhang, J. R. & Norris, S. J. Genetic variation of the *Borrelia burgdorferi* gene vlsE  
888 involves cassette-specific, segmental gene conversion. *Infection and immunity* **66**,  
889 3698-3704, doi:10.1128/IAI.66.8.3698-3704.1998 (1998).
- 890 15 Reddick, L. E. & Alto, N. M. Bacteria fighting back: how pathogens target and  
891 subvert the host innate immune system. *Molecular cell* **54**, 321-328,  
892 doi:10.1016/j.molcel.2014.03.010 (2014).
- 893 16 Vieira, M. L. *et al.* *Leptospira interrogans* outer membrane protein LipL21 is a potent  
894 inhibitor of neutrophil myeloperoxidase. *Virulence* **9**, 414-425,  
895 doi:10.1080/21505594.2017.1407484 (2018).
- 896 17 Brinkmann, V. *et al.* Neutrophil extracellular traps kill bacteria. *Science* **303**, 1532-  
897 1535, doi:10.1126/science.1092385 (2004).
- 898 18 Chin, V. K., Basir, R., Nordin, S. A., Abdullah, M. & Sekawi, Z. Pathology and Host  
899 Immune Evasion During Human Leptospirosis: a Review. *International microbiology*  
900 *: the official journal of the Spanish Society for Microbiology* **23**, 127-136,  
901 doi:10.1007/s10123-019-00067-3 (2020).
- 902 19 Fernandes, L. G. *et al.* *Leptospira* spp.: Novel insights into host-pathogen interactions.  
903 *Veterinary immunology and immunopathology* **176**, 50-57,  
904 doi:10.1016/j.vetimm.2015.12.004 (2016).
- 905 20 Fraga, T. R., Isaac, L. & Barbosa, A. S. Complement Evasion by Pathogenic  
906 *Leptospira*. *Frontiers in immunology* **7**, 623, doi:10.3389/fimmu.2016.00623 (2016).
- 907 21 Chassin, C. *et al.* TLR4- and TLR2-mediated B cell responses control the clearance of  
908 the bacterial pathogen, *Leptospira interrogans*. *Journal of immunology* **183**, 2669-  
909 2677, doi:10.4049/jimmunol.0900506 (2009).
- 910 22 Faisal, S. M. *et al.* *Leptospira* surface adhesin (Lsa21) induces Toll like receptor 2 and  
911 4 mediated inflammatory responses in macrophages. *Scientific reports* **6**, 39530,  
912 doi:10.1038/srep39530 (2016).
- 913 23 Wang, H. *et al.* Leptospiral hemolysins induce proinflammatory cytokines through  
914 Toll-like receptor 2-and 4-mediated JNK and NF-kappaB signaling pathways. *PLoS*  
915 *one* **7**, e42266, doi:10.1371/journal.pone.0042266 (2012).
- 916 24 Lo, Y. Y. *et al.* Essential calcium-binding cluster of *Leptospira* LipL32 protein for  
917 inflammatory responses through the Toll-like receptor 2 pathway. *The Journal of*  
918 *biological chemistry* **288**, 12335-12344, doi:10.1074/jbc.M112.418699 (2013).
- 919 25 da Silva, L. B. *et al.* Pathogenic *Leptospira* species acquire factor H and vitronectin  
920 via the surface protein LcpA. *Infection and immunity* **83**, 888-897,  
921 doi:10.1128/IAI.02844-14 (2015).

- 922 26 Siqueira, G. H., Atzingen, M. V., de Souza, G. O., Vasconcellos, S. A. & Nascimento,  
923 A. *Leptospira interrogans* Lsa23 protein recruits plasminogen, factor H and C4BP  
924 from normal human serum and mediates C3b and C4b degradation. *Microbiology*  
925 **162**, 295-308, doi:10.1099/mic.0.000217 (2016).
- 926 27 Castiblanco-Valencia, M. M. *et al.* Acquisition of negative complement regulators by  
927 the saprophyte *Leptospira biflexa* expressing LigA or LigB confers enhanced survival  
928 in human serum. *Immunology letters* **173**, 61-68, doi:10.1016/j.imlet.2016.03.005  
929 (2016).
- 930 28 Stevenson, B. *et al.* *Leptospira interrogans* endostatin-like outer membrane proteins  
931 bind host fibronectin, laminin and regulators of complement. *PLoS one* **2**, e1188,  
932 doi:10.1371/journal.pone.0001188 (2007).
- 933 29 Castiblanco-Valencia, M. M. *et al.* Leptospiral immunoglobulin-like proteins interact  
934 with human complement regulators factor H, FHL-1, FHR-1, and C4BP. *The Journal*  
935 *of infectious diseases* **205**, 995-1004, doi:10.1093/infdis/jir875 (2012).
- 936 30 Breda, L. C. *et al.* Fine Mapping of the Interaction between C4b-Binding Protein and  
937 Outer Membrane Proteins LigA and LigB of Pathogenic *Leptospira interrogans*. *PLoS*  
938 *neglected tropical diseases* **9**, e0004192, doi:10.1371/journal.pntd.0004192 (2015).
- 939 31 Scharrig, E. *et al.* Neutrophil Extracellular Traps are Involved in the Innate Immune  
940 Response to Infection with *Leptospira*. *PLoS neglected tropical diseases* **9**, e0003927,  
941 doi:10.1371/journal.pntd.0003927 (2015).
- 942 32 Matsunaga, J. *et al.* Pathogenic *Leptospira* species express surface-exposed proteins  
943 belonging to the bacterial immunoglobulin superfamily. *Molecular microbiology* **49**,  
944 929-945, doi:10.1046/j.1365-2958.2003.03619.x (2003).
- 945 33 McBride, A. J. *et al.* Genetic diversity of the Leptospiral immunoglobulin-like (Lig)  
946 genes in pathogenic *Leptospira* spp. *Infection, genetics and evolution : journal of*  
947 *molecular epidemiology and evolutionary genetics in infectious diseases* **9**, 196-205,  
948 doi:10.1016/j.meegid.2008.10.012 (2009).
- 949 34 Choy, H. A. *et al.* Physiological osmotic induction of *Leptospira interrogans*  
950 adhesion: LigA and LigB bind extracellular matrix proteins and fibrinogen. *Infection*  
951 *and immunity* **75**, 2441-2450, doi:10.1128/IAI.01635-06 (2007).
- 952 35 Lin, Y. P., McDonough, S. P., Sharma, Y. & Chang, Y. F. The terminal  
953 immunoglobulin-like repeats of LigA and LigB of *Leptospira* enhance their binding to  
954 gelatin binding domain of fibronectin and host cells. *PLoS one* **5**, e11301,  
955 doi:10.1371/journal.pone.0011301 (2010).
- 956 36 Faisal, S. M. *et al.* Evaluation of protective immunity of *Leptospira* immunoglobulin  
957 like protein A (LigA) DNA vaccine against challenge in hamsters. *Vaccine* **26**, 277-  
958 287, doi:10.1016/j.vaccine.2007.10.029 (2008).
- 959 37 Faisal, S. M., Yan, W., McDonough, S. P. & Chang, Y. F. *Leptospira*  
960 immunoglobulin-like protein A variable region (LigAvar) incorporated in liposomes  
961 and PLGA microspheres produces a robust immune response correlating to protective  
962 immunity. *Vaccine* **27**, 378-387, doi:10.1016/j.vaccine.2008.10.089 (2009).
- 963 38 Silva, E. F. *et al.* The terminal portion of leptospiral immunoglobulin-like protein  
964 LigA confers protective immunity against lethal infection in the hamster model of  
965 leptospirosis. *Vaccine* **25**, 6277-6286, doi:10.1016/j.vaccine.2007.05.053 (2007).
- 966 39 Lourdault, K. *et al.* Oral immunization with *Escherichia coli* expressing a lipidated  
967 form of LigA protects hamsters against challenge with *Leptospira interrogans* serovar  
968 Copenhageni. *Infection and immunity* **82**, 893-902, doi:10.1128/IAI.01533-13 (2014).
- 969 40 Coutinho, M. L. *et al.* A LigA three-domain region protects hamsters from lethal  
970 infection by *Leptospira interrogans*. *PLoS neglected tropical diseases* **5**, e1422,  
971 doi:10.1371/journal.pntd.0001422 (2011).

- 972 41 Evangelista, K. V., Lourdault, K., Matsunaga, J. & Haake, D. A. Immunoprotective  
973 properties of recombinant LigA and LigB in a hamster model of acute leptospirosis.  
974 *PloS one* **12**, e0180004, doi:10.1371/journal.pone.0180004 (2017).
- 975 42 Choy, H. A. Multiple activities of LigB potentiate virulence of *Leptospira interrogans*:  
976 inhibition of alternative and classical pathways of complement. *PloS one* **7**, e41566,  
977 doi:10.1371/journal.pone.0041566 (2012).
- 978 43 Castiblanco-Valencia, M. M. *et al.* Plasmin cleaves fibrinogen and the human  
979 complement proteins C3b and C5 in the presence of *Leptospira interrogans* proteins:  
980 A new role of LigA and LigB in invasion and complement immune evasion.  
981 *Immunobiology* **221**, 679-689, doi:10.1016/j.imbio.2016.01.001 (2016).
- 982 44 Swamydas, M. & Lionakis, M. S. Isolation, purification and labeling of mouse bone  
983 marrow neutrophils for functional studies and adoptive transfer experiments. *J Vis*  
984 *Exp*, e50586, doi:10.3791/50586 (2013).
- 985 45 Bunikis, J. & Barbour, A. G. Access of antibody or trypsin to an integral outer  
986 membrane protein (P66) of *Borrelia burgdorferi* is hindered by Osp lipoproteins.  
987 *Infection and immunity* **67**, 2874-2883, doi:10.1128/IAI.67.6.2874-2883.1999 (1999).
- 988 46 Matsuura, M. Structural Modifications of Bacterial Lipopolysaccharide that Facilitate  
989 Gram-Negative Bacteria Evasion of Host Innate Immunity. *Frontiers in immunology*  
990 **4**, 109, doi:10.3389/fimmu.2013.00109 (2013).
- 991 47 Barbour, A. G. & Restrepo, B. I. Antigenic variation in vector-borne pathogens.  
992 *Emerging infectious diseases* **6**, 449-457, doi:10.3201/eid0605.000502 (2000).
- 993 48 Xu, Q., Seemanapalli, S. V., McShan, K. & Liang, F. T. Constitutive expression of  
994 outer surface protein C diminishes the ability of *Borrelia burgdorferi* to evade specific  
995 humoral immunity. *Infection and immunity* **74**, 5177-5184, doi:10.1128/IAI.00713-06  
996 (2006).
- 997 49 Viriyakosol, S., Matthias, M. A., Swancutt, M. A., Kirkland, T. N. & Vinetz, J. M.  
998 Toll-like receptor 4 protects against lethal *Leptospira interrogans* serovar  
999 icterohaemorrhagiae infection and contributes to in vivo control of leptospiral burden.  
1000 *Infection and immunity* **74**, 887-895, doi:10.1128/IAI.74.2.887-895.2006 (2006).
- 1001 50 Hung, C. C. *et al.* Leptospiral membrane proteins stimulate pro-inflammatory  
1002 chemokines secretion by renal tubule epithelial cells through toll-like receptor 2 and  
1003 p38 mitogen activated protein kinase. *Nephrology, dialysis, transplantation : official*  
1004 *publication of the European Dialysis and Transplant Association - European Renal*  
1005 *Association* **21**, 898-910, doi:10.1093/ndt/gfi316 (2006).
- 1006 51 Yang, C. W. Leptospirosis renal disease: understanding the initiation by Toll-like  
1007 receptors. *Kidney international* **72**, 918-925, doi:10.1038/sj.ki.5002393 (2007).
- 1008 52 Zhang, Y., Bao, L., Zhu, H., Huang, B. & Zhang, H. OmpA-like protein Loa22 from  
1009 *Leptospira interrogans* serovar Lai is cytotoxic to cultured rat renal cells and promotes  
1010 inflammatory responses. *Acta biochimica et biophysica Sinica* **42**, 70-79,  
1011 doi:10.1093/abbs/gmp109 (2010).
- 1012 53 Matsunaga, J. *et al.* Response of *Leptospira interrogans* to physiologic osmolarity:  
1013 relevance in signaling the environment-to-host transition. *Infection and immunity* **75**,  
1014 2864-2874, doi:10.1128/IAI.01619-06 (2007).
- 1015 54 Chambers, M. A. *et al.* Non-acylated *Mycobacterium bovis* glycoprotein MPB83  
1016 binds to TLR1/2 and stimulates production of matrix metalloproteinase 9.  
1017 *Biochemical and biophysical research communications* **400**, 403-408,  
1018 doi:10.1016/j.bbrc.2010.08.085 (2010).
- 1019 55 Sing, A. *et al.* A hypervariable N-terminal region of *Yersinia LcrV* determines Toll-  
1020 like receptor 2-mediated IL-10 induction and mouse virulence. *Proceedings of the*

- 1021 *National Academy of Sciences of the United States of America* **102**, 16049-16054,  
1022 doi:10.1073/pnas.0504728102 (2005).
- 1023 56 Liu, X., Wetzler, L. M., Nascimento, L. O. & Massari, P. Human airway epithelial  
1024 cell responses to *Neisseria lactamica* and purified porin via Toll-like receptor 2-  
1025 dependent signaling. *Infection and immunity* **78**, 5314-5323, doi:10.1128/IAI.00681-  
1026 10 (2010).
- 1027 57 Ogawa, T., Asai, Y., Hashimoto, M. & Uchida, H. Bacterial fimbriae activate human  
1028 peripheral blood monocytes utilizing TLR2, CD14 and CD11a/CD18 as cellular  
1029 receptors. *European journal of immunology* **32**, 2543-2550, doi:10.1002/1521-  
1030 4141(200209)32:9<2543::AID-IMMU2543>3.0.CO;2-2 (2002).
- 1031 58 Hajishengallis, G., Ratti, P. & Harokopakis, E. Peptide mapping of bacterial fimbrial  
1032 epitopes interacting with pattern recognition receptors. *The Journal of biological*  
1033 *chemistry* **280**, 38902-38913, doi:10.1074/jbc.M507326200 (2005).
- 1034 59 Choi, H. G. *et al.* Mycobacterium tuberculosis Rv2882c Protein Induces Activation of  
1035 Macrophages through TLR4 and Exhibits Vaccine Potential. *PloS one* **11**, e0164458,  
1036 doi:10.1371/journal.pone.0164458 (2016).
- 1037 60 Byun, E. H. *et al.* Rv0315, a novel immunostimulatory antigen of Mycobacterium  
1038 tuberculosis, activates dendritic cells and drives Th1 immune responses. *Journal of*  
1039 *molecular medicine* **90**, 285-298, doi:10.1007/s00109-011-0819-2 (2012).
- 1040 61 Berguer, P. M., Mundinano, J., Piazzon, I. & Goldbaum, F. A. A polymeric bacterial  
1041 protein activates dendritic cells via TLR4. *Journal of immunology* **176**, 2366-2372,  
1042 doi:10.4049/jimmunol.176.4.2366 (2006).
- 1043 62 Pasquevich, K. A. *et al.* The protein moiety of *Brucella abortus* outer membrane  
1044 protein 16 is a new bacterial pathogen-associated molecular pattern that activates  
1045 dendritic cells in vivo, induces a Th1 immune response, and is a promising self-  
1046 adjuvanting vaccine against systemic and oral acquired brucellosis. *Journal of*  
1047 *immunology* **184**, 5200-5212, doi:10.4049/jimmunol.0902209 (2010).
- 1048 63 Li, J. Y., Liu, Y., Gao, X. X., Gao, X. & Cai, H. TLR2 and TLR4 signaling pathways  
1049 are required for recombinant *Brucella abortus* BCSP31-induced cytokine production,  
1050 functional upregulation of mouse macrophages, and the Th1 immune response in vivo  
1051 and in vitro. *Cellular & molecular immunology* **11**, 477-494,  
1052 doi:10.1038/cmi.2014.28 (2014).
- 1053 64 Chen, S. T., Li, J. Y., Zhang, Y., Gao, X. & Cai, H. Recombinant MPT83 derived  
1054 from Mycobacterium tuberculosis induces cytokine production and upregulates the  
1055 function of mouse macrophages through TLR2. *Journal of immunology* **188**, 668-677,  
1056 doi:10.4049/jimmunol.1102177 (2012).
- 1057 65 Jung, S. B. *et al.* The mycobacterial 38-kilodalton glycolipoprotein antigen activates  
1058 the mitogen-activated protein kinase pathway and release of proinflammatory  
1059 cytokines through Toll-like receptors 2 and 4 in human monocytes. *Infection and*  
1060 *immunity* **74**, 2686-2696, doi:10.1128/IAI.74.5.2686-2696.2006 (2006).
- 1061 66 Sjolinder, M. *et al.* The meningococcal adhesin NhhA provokes proinflammatory  
1062 responses in macrophages via toll-like receptor 4-dependent and -independent  
1063 pathways. *Infection and immunity* **80**, 4027-4033, doi:10.1128/IAI.00456-12 (2012).
- 1064 67 Lee, S. J. *et al.* A potential protein adjuvant derived from Mycobacterium tuberculosis  
1065 Rv0652 enhances dendritic cells-based tumor immunotherapy. *PloS one* **9**, e104351,  
1066 doi:10.1371/journal.pone.0104351 (2014).
- 1067 68 Bao, Y. *et al.* Identification of IFN-gamma-producing innate B cells. *Cell research*  
1068 **24**, 161-176, doi:10.1038/cr.2013.155 (2014).
- 1069 69 Johnson, R. C. & Muschel, L. H. Antileptospiral Activity of Normal Serum. *Journal*  
1070 *of bacteriology* **89**, 1625-1626, doi:10.1128/jb.89.6.1625-1626.1965 (1965).

- 1071 70 Meri, T., Murgia, R., Stefanel, P., Meri, S. & Cinco, M. Regulation of complement  
1072 activation at the C3-level by serum resistant leptospire. *Microbial pathogenesis* **39**,  
1073 139-147, doi:10.1016/j.micpath.2005.07.003 (2005).
- 1074 71 Wolff, D. G. *et al.* Interaction of *Leptospira* elongation factor Tu with plasminogen  
1075 and complement factor H: a metabolic leptospiral protein with moonlighting  
1076 activities. *PloS one* **8**, e81818, doi:10.1371/journal.pone.0081818 (2013).
- 1077 72 Barbosa, A. S. *et al.* Functional characterization of LcpA, a surface-exposed protein  
1078 of *Leptospira* spp. that binds the human complement regulator C4BP. *Infection and*  
1079 *immunity* **78**, 3207-3216, doi:10.1128/IAI.00279-10 (2010).
- 1080 73 Verma, A. *et al.* LfhA, a novel factor H-binding protein of *Leptospira* interrogans.  
1081 *Infection and immunity* **74**, 2659-2666, doi:10.1128/IAI.74.5.2659-2666.2006 (2006).
- 1082 74 Souza, N. M. *et al.* Lsa30, a novel adhesin of *Leptospira* interrogans binds human  
1083 plasminogen and the complement regulator C4bp. *Microbial pathogenesis* **53**, 125-  
1084 134, doi:10.1016/j.micpath.2012.06.001 (2012).
- 1085 75 Kochi, L. T. *et al.* The interaction of two novel putative proteins of *Leptospira*  
1086 interrogans with E-cadherin, plasminogen and complement components with potential  
1087 role in bacterial infection. *Virulence* **10**, 734-753,  
1088 doi:10.1080/21505594.2019.1650613 (2019).
- 1089 76 McDonald, B., Urrutia, R., Yipp, B. G., Jenne, C. N. & Kubes, P. Intravascular  
1090 neutrophil extracellular traps capture bacteria from the bloodstream during sepsis.  
1091 *Cell host & microbe* **12**, 324-333, doi:10.1016/j.chom.2012.06.011 (2012).
- 1092 77 Berends, E. T. *et al.* Nuclease expression by *Staphylococcus aureus* facilitates escape  
1093 from neutrophil extracellular traps. *Journal of innate immunity* **2**, 576-586,  
1094 doi:10.1159/000319909 (2010).
- 1095 78 Jhelum, H., Sori, H. & Sehgal, D. A novel extracellular vesicle-associated  
1096 endodeoxyribonuclease helps *Streptococcus pneumoniae* evade neutrophil  
1097 extracellular traps and is required for full virulence. *Scientific reports* **8**, 7985,  
1098 doi:10.1038/s41598-018-25865-z (2018).
- 1099 79 Zheng, L. *et al.* Streptococcal 5'-Nucleotidase A (S5nA), a Novel *Streptococcus*  
1100 *pyogenes* Virulence Factor That Facilitates Immune Evasion. *The Journal of*  
1101 *biological chemistry* **290**, 31126-31137, doi:10.1074/jbc.M115.677443 (2015).
- 1102 80 Kumar, S., Sunagar, R. & Gosselin, E. Bacterial Protein Toll-Like-Receptor Agonists:  
1103 A Novel Perspective on Vaccine Adjuvants. *Frontiers in immunology* **10**, 1144,  
1104 doi:10.3389/fimmu.2019.01144 (2019).
- 1105  
1106  
1107

## 1108 **Acknowledgments**

1109 This work was supported partly from the DBT project- BT/PR21430/ADV/90/246/2016  
1110 (SP025) on developing *Leptospira* vaccines and partly from DBT-NIAB flagship project No-  
1111 BT/AAQ/01/NIAB-Flagship/2019 (SP051) on host-pathogen interaction, which are funded to  
1112 SMF from the Department of Biotechnology, Ministry of Science and Technology,  
1113 Government of India. Financial support from the NIAB core fund is duly acknowledged. The  
1114 authors would like to thank the Director, NIAB, Dr. Subeer S. Majumdar, for providing the  
1115 necessary infrastructural facility and support for the execution of the above study. Thanks to  
1116 Mr. Shashikant Gawai and Mrs. Rama Devi for helping in confocal microscopy and Flow

1117 cytometry. Thanks to Dr. Jayant Hole for help in animal experiments. AK is supported by  
1118 UGC fellowship and registered for Ph.D. program at RCB, Faridabad. VPV is supported by  
1119 CSIR fellowship and registered for Ph.D. program at Manipal University, Manipal.

#### 1120 **Author's contribution**

1121 SMF conceived the idea and designed the experiments. AK, VPV, SK, MA, PV, MAT  
1122 performed the experiments. AK, VPV, SK and SMF analyzed the data. VPV made all the  
1123 figures of the manuscript and did the statistical analysis. YFC contributed reagents and  
1124 input in experiment design and data analysis. SMF, AK, and VPV wrote the initial draft,  
1125 and SMF edited the manuscript. All authors approved the final version of the manuscript.

1126

1127

#### 1128 **Competing interests**

1129 The authors declare no competing financial interests.

1130

1131

**Fig. 1**

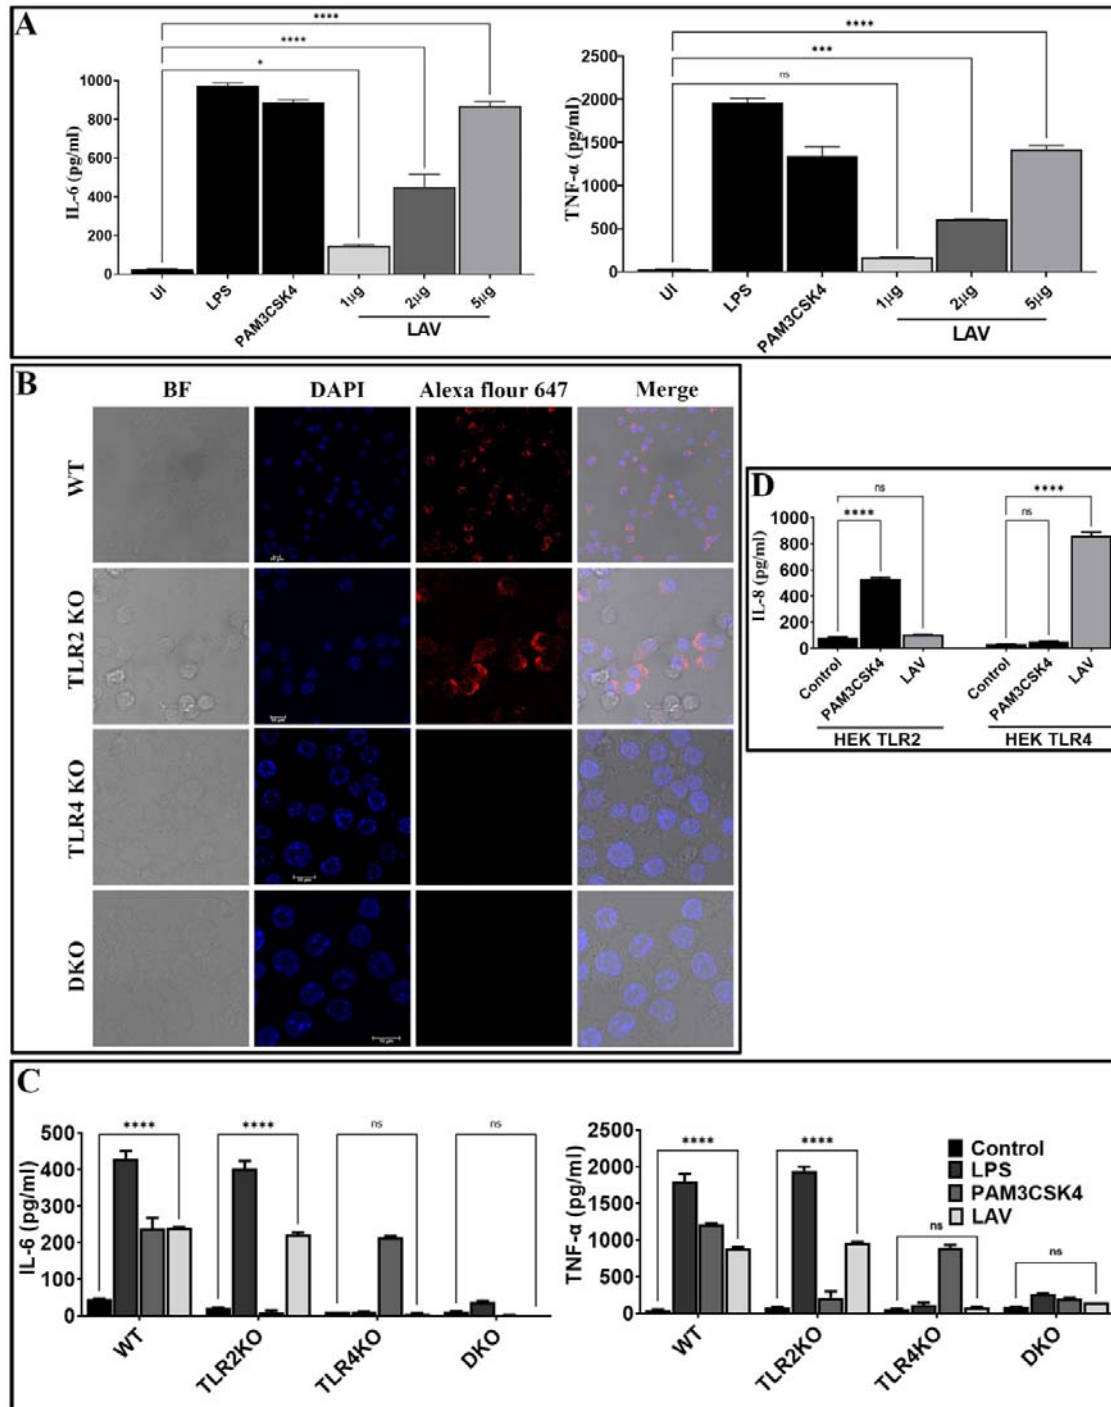

1132  
1133  
1134  
1135



**Fig. 2**

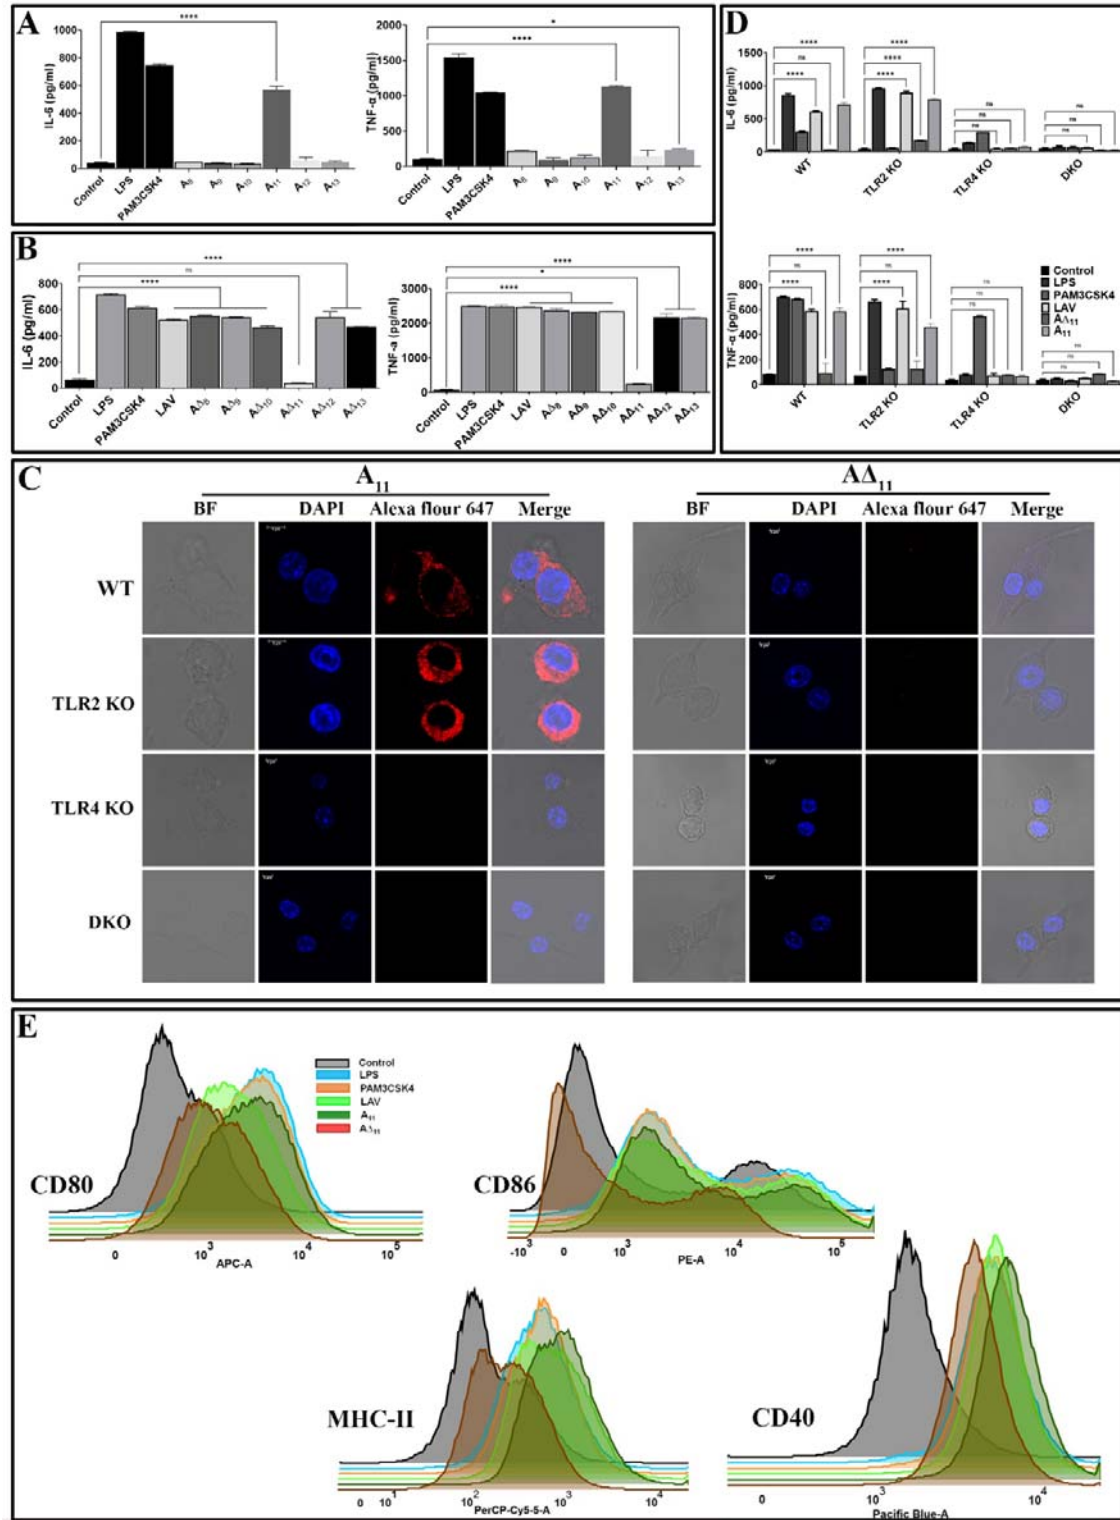

1136  
1137

**Fig. 3**

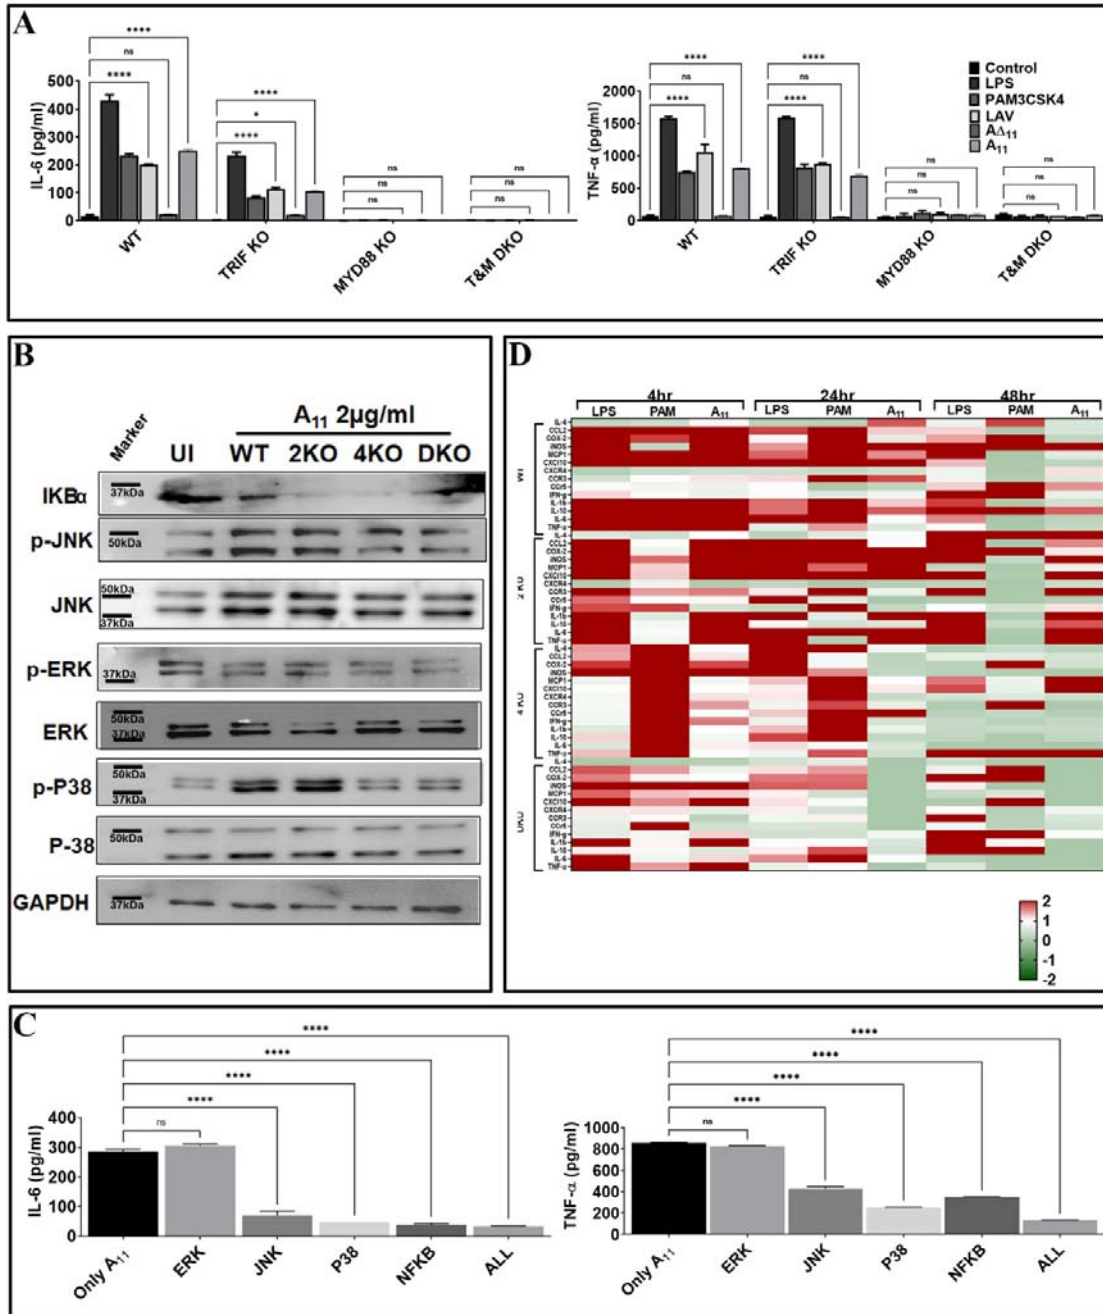

1138  
1139  
1140  
1141

**Fig. 4**

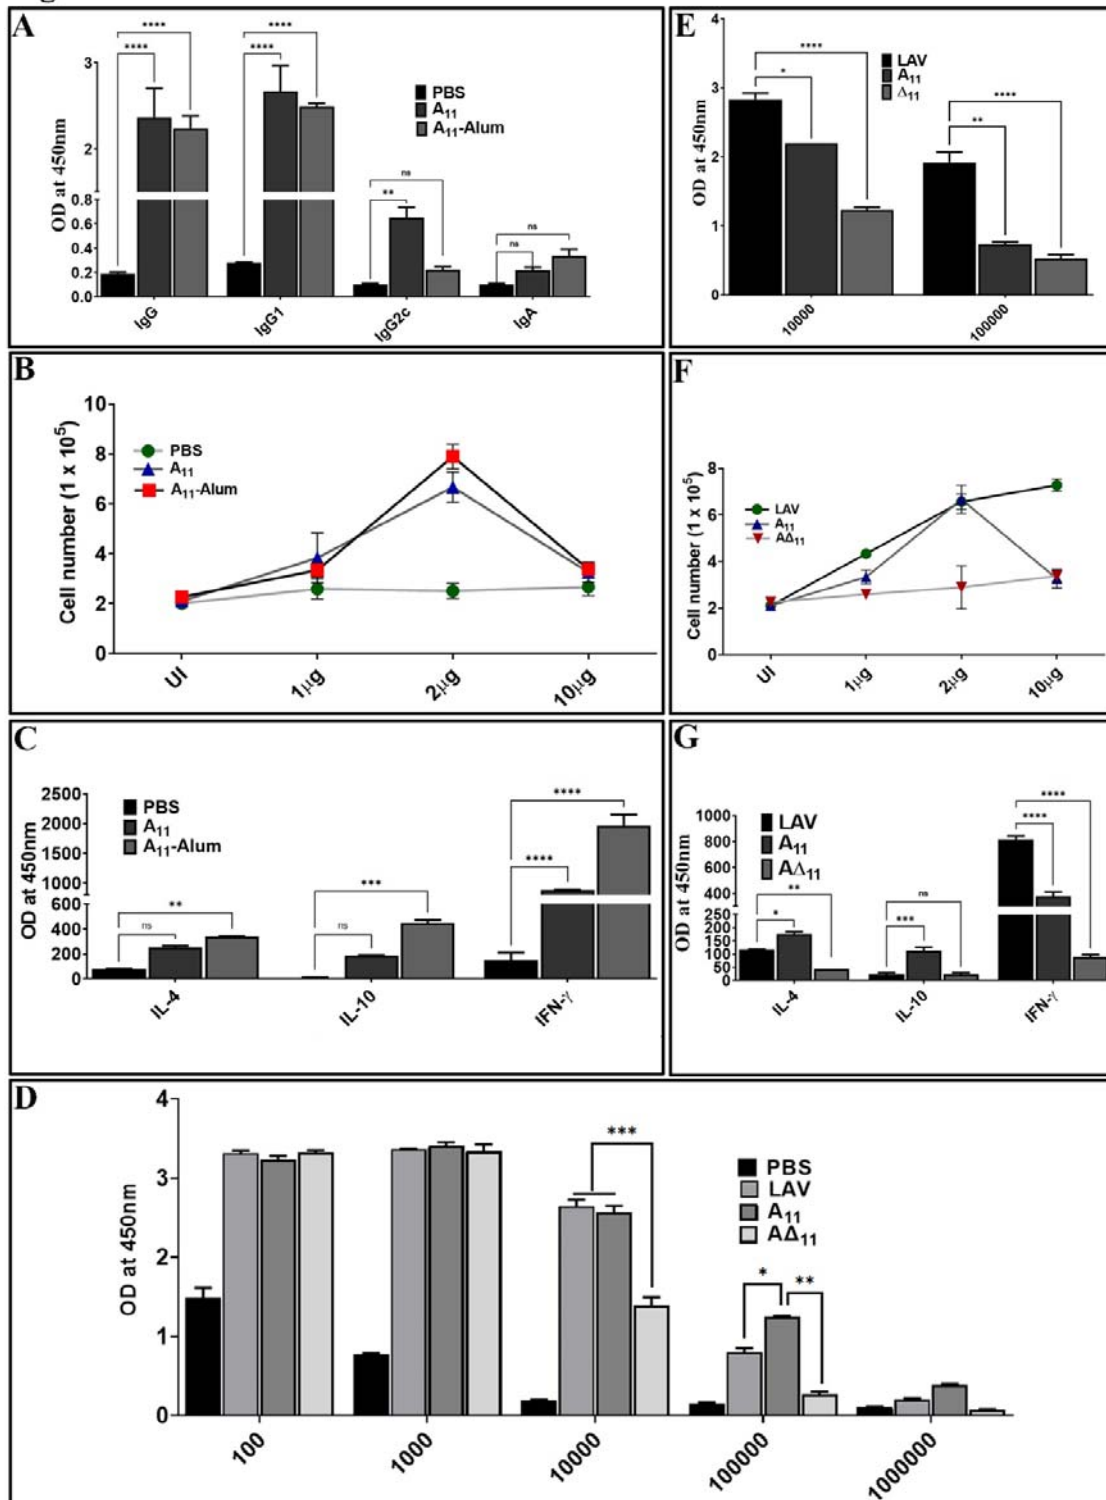

1142

1143

1144

**Fig. 5**

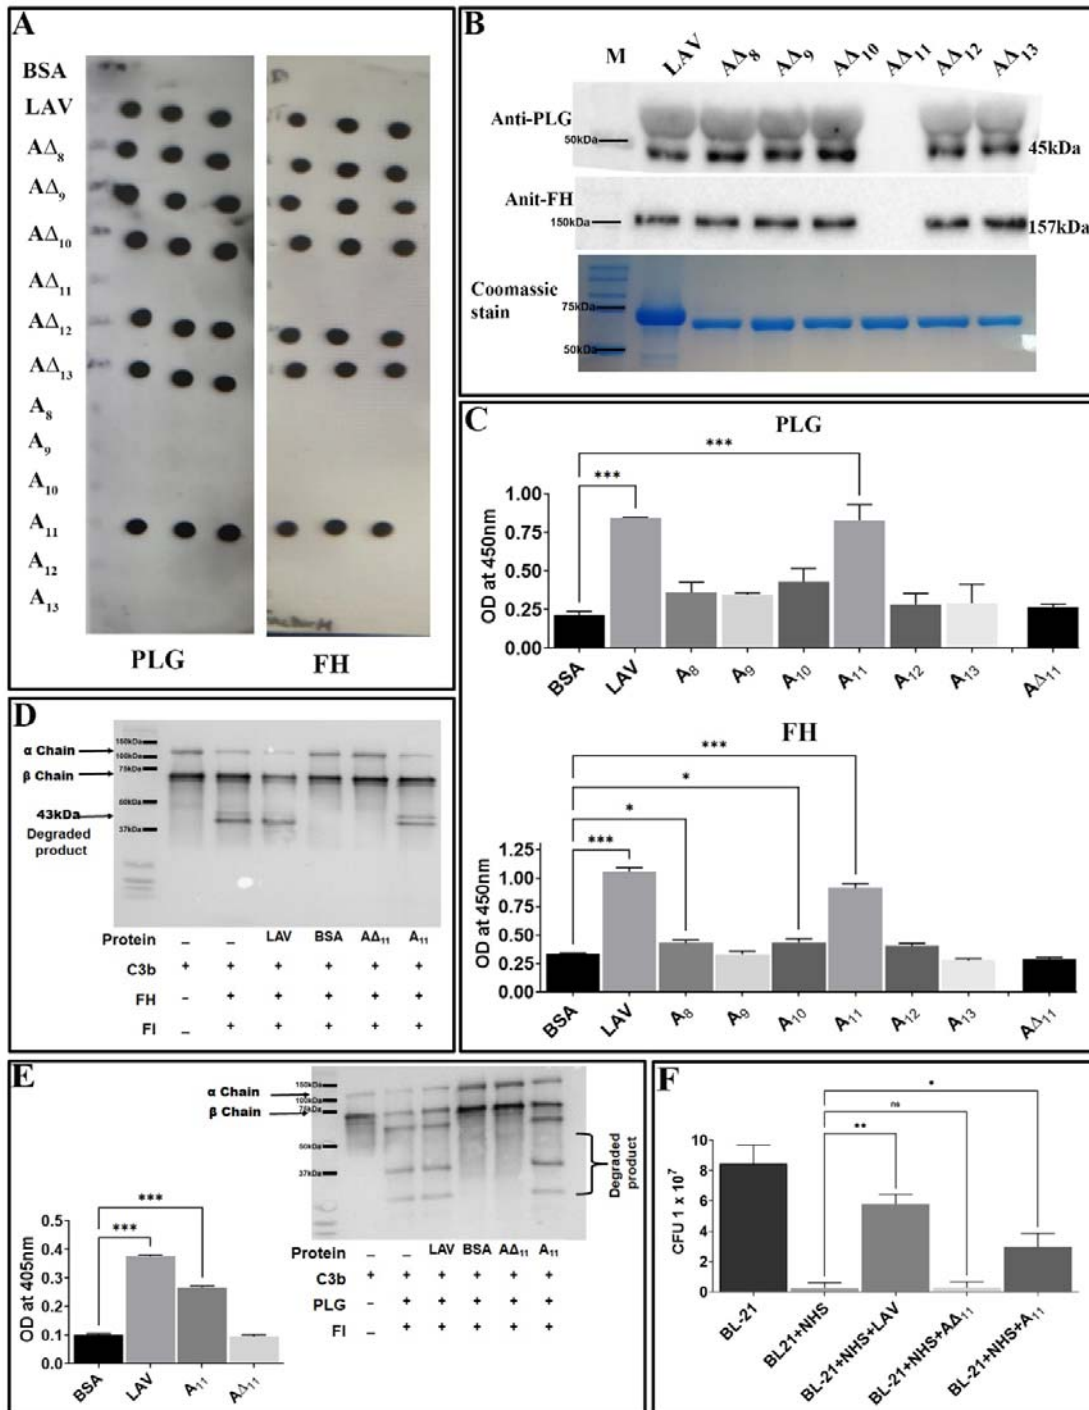

1145

1146

1147

**Fig. 6**

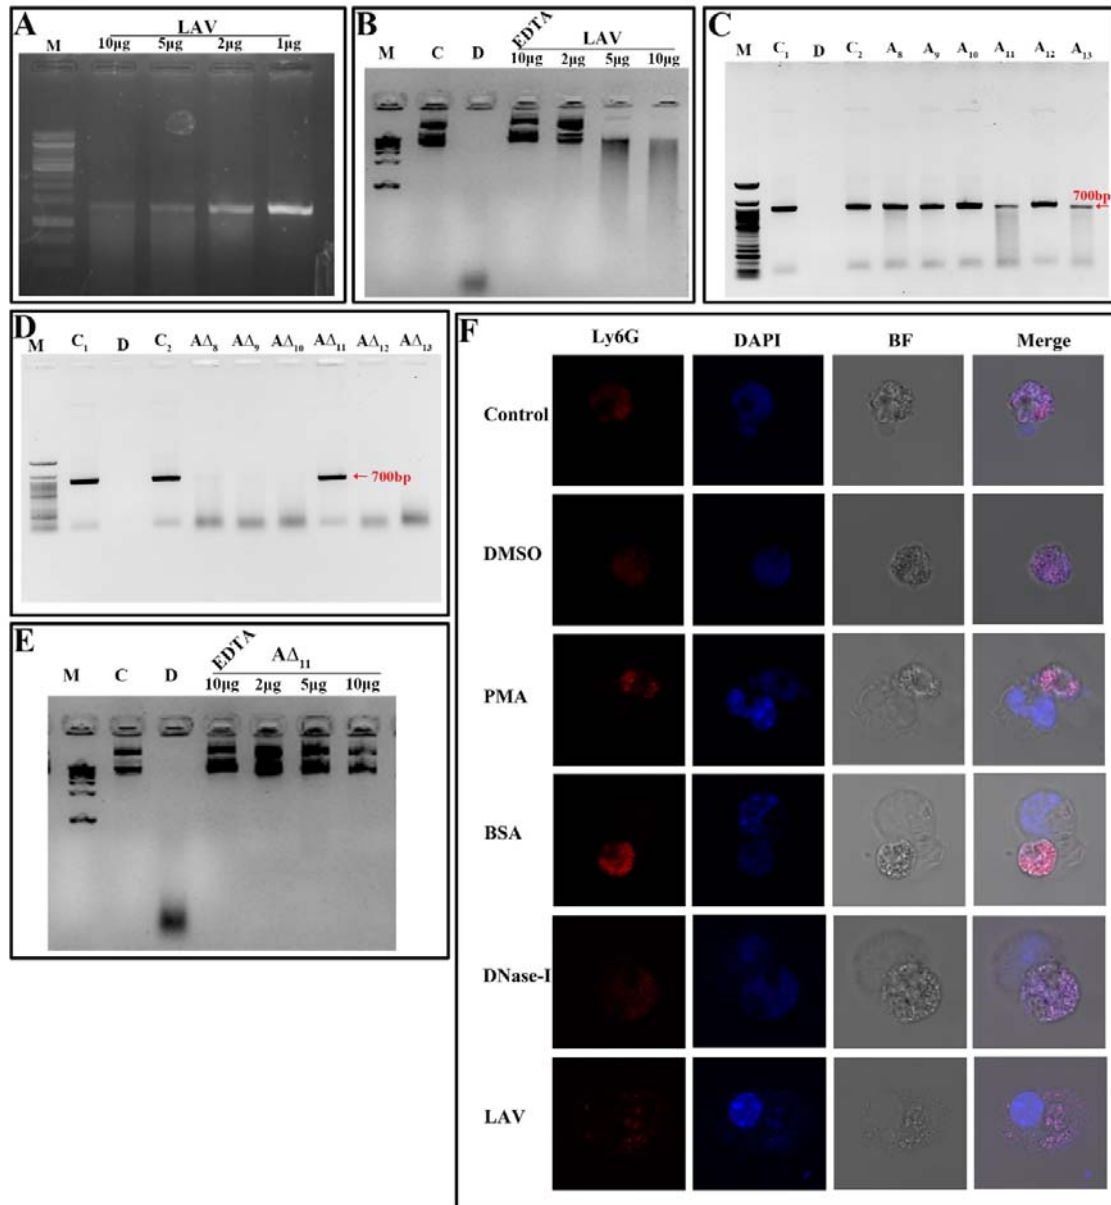

1148

1149

1150

1151

1152 **Fig. 7**

1153

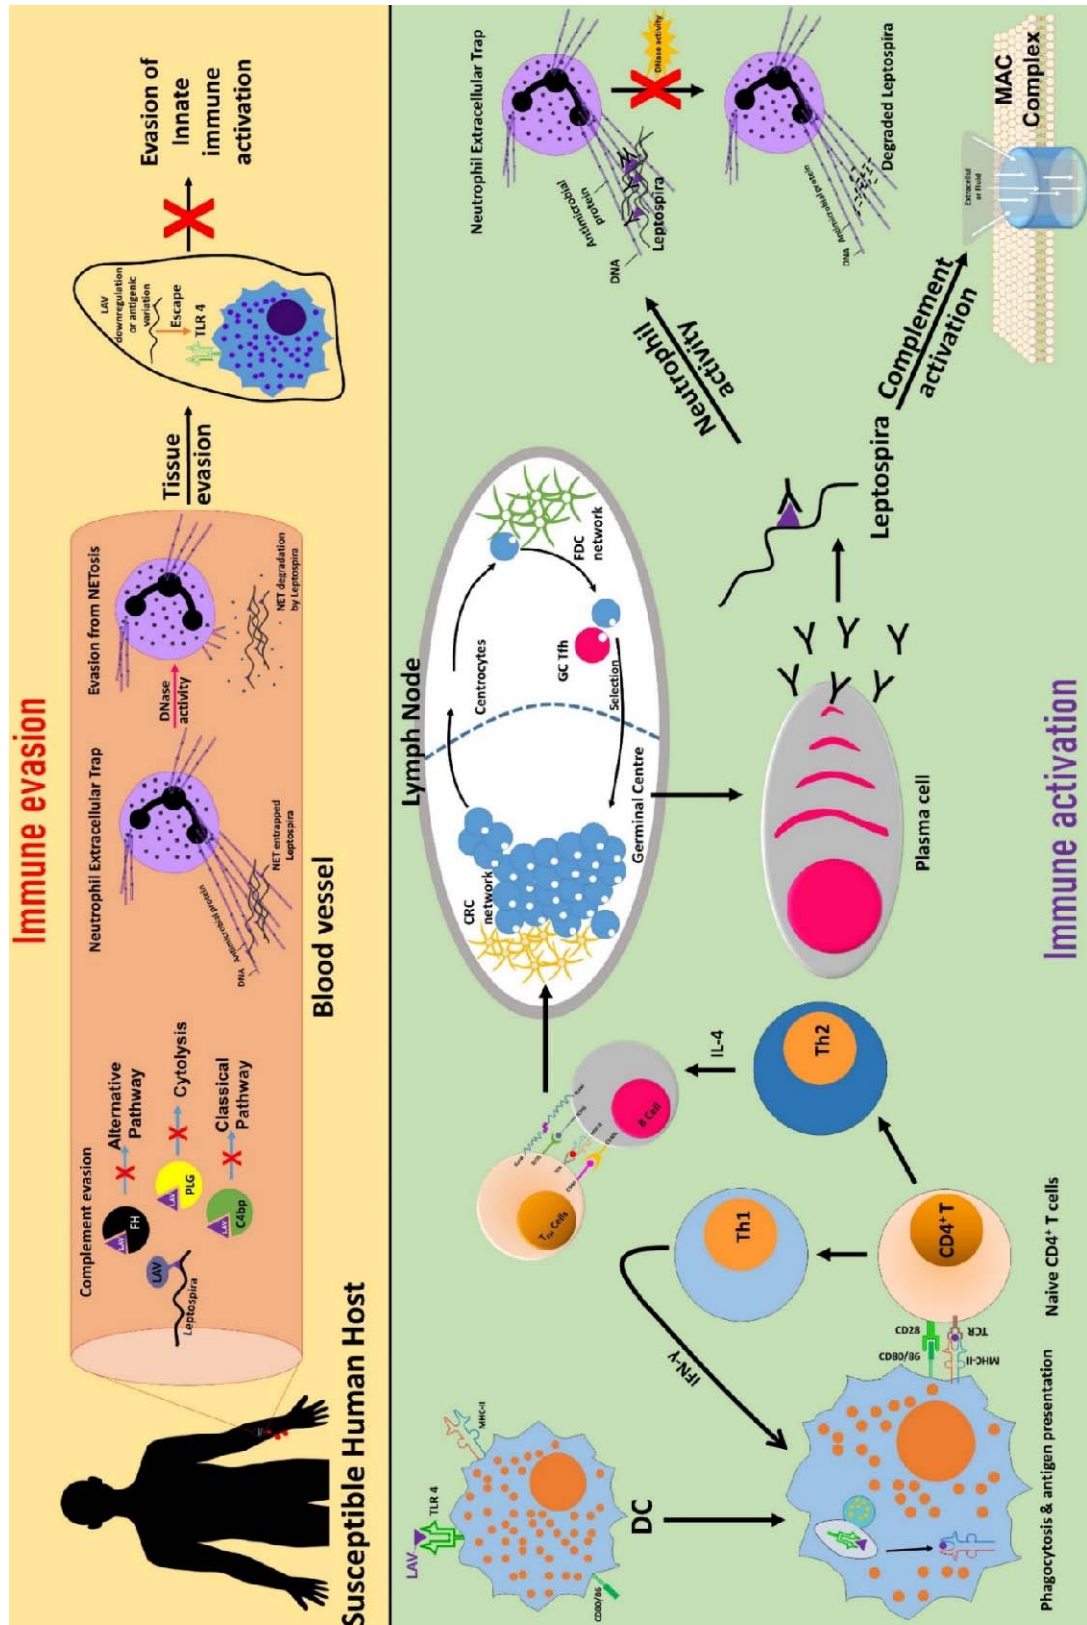

1154

## **Supplementary Materials**

1155

1156 **Title:** Deciphering the role of *Leptospira* surface protein LigA in modulating the host innate  
1157 immune response

1158

1159 Authors: Ajay Kumar ,Vivek P. Varma, Kavela Sridhar , Mohd Abdullah, Pallavi Vyas,  
1160 Muhammed Ashiq T, Yung-Fu Chang, Syed M. Faisal\*

1161

1162 \*Correspondence to: [faisal@niab.org.in](mailto:faisal@niab.org.in) or [smfaisal77@gmail.com](mailto:smfaisal77@gmail.com)

1163

1164 **The supplementary file contains-**

1165

1166 **Figure S1-** Purification of recombinant proteins.

1167 **Figure S2-** Effect on TLR activity after pre-treatment of purified recombinant proteins with  
1168 Polymixin B and Proteinase K

1169 **Figure S3-** Circular dichroism spectra of the recombinant proteins.

1170 **Figure S4-** Bacterial survival assay

1171 **Table 1-** Primers used for RT-PCR

1172 **Table 2-** Primers used for creating deletion domains of LAV

1173

1174

1175

1176

1177

1178

1179

1180

1181

1182

1183

1184

## Figure S1

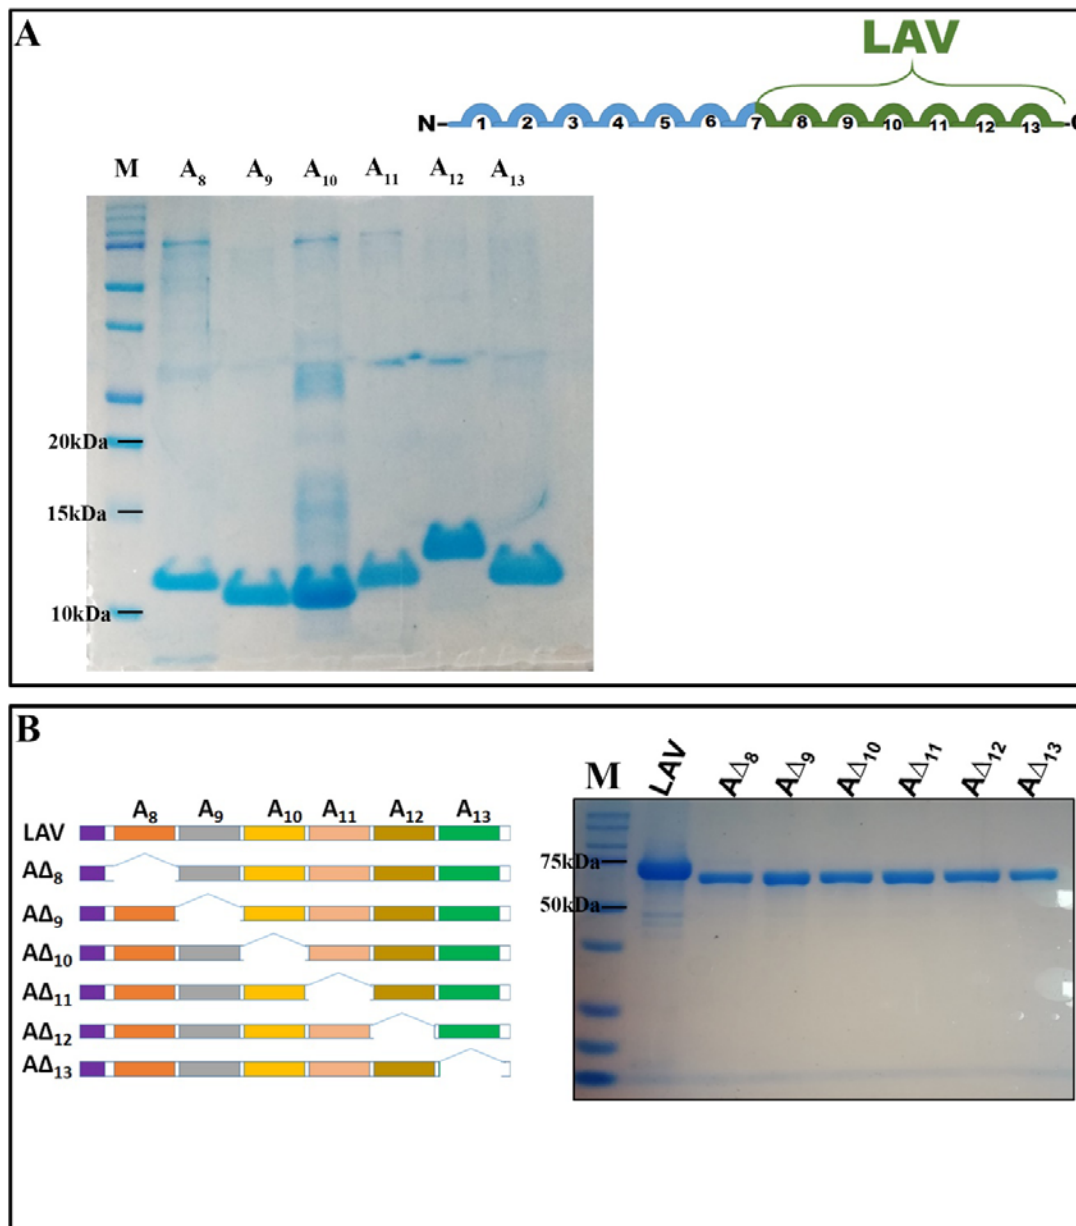

1185

1186

### Sup. Fig. 1: Purification of recombinant proteins.

1187

(A) SDS PAGE profile of domains of Variable A (LAV). The recombinant proteins were purified as His-sumo fusion proteins as described in materials and methods. The expected molecular weight of each domain ranges from 11-12kd . (B) Schematic presentation of strategy of creating LAV domain deletion mutants (AΔ<sub>8</sub>- AΔ<sub>13</sub>) by PCR based site-directed mutagenesis and SDS PAGE profile of purified proteins. The recombinant proteins were purified as His-sumo fusion proteins as described in materials and methods. The expected molecular weight of LAV was 73kd and each domain deletion mutant was ~63kd. Data are representative of three independent experiments. (\*Indicates P < 0.05).

1194

1195



1196 **Figure S2**

1197

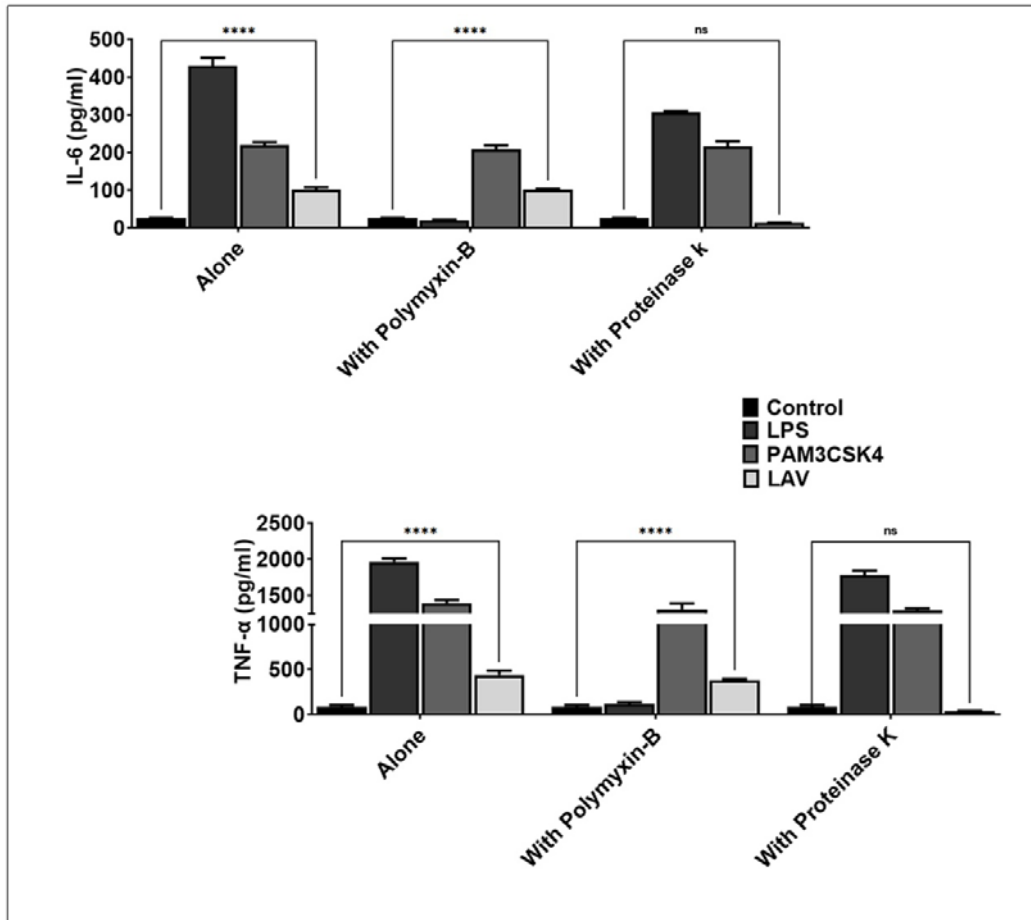

1198

1199

1200

1201 **Sup. Fig. 2: Effect on TLR activity after pre-treatment of purified recombinant proteins**  
1202 **with Polymixin B and Proteinase K.** RAW264.7 cells were incubated with 2 $\mu$ g/ml of  
1203 purified LAV pre-treated with Polymyxin B or Proteinase- K as mentioned in materials and  
1204 methods and supernatant was collected to measure levels of IL-6 and TNF- $\alpha$  by ELISA.

1205

1206

1207

1208

1209

1210

1211

1212

1213

1214

1215 **Figure S3**

1216

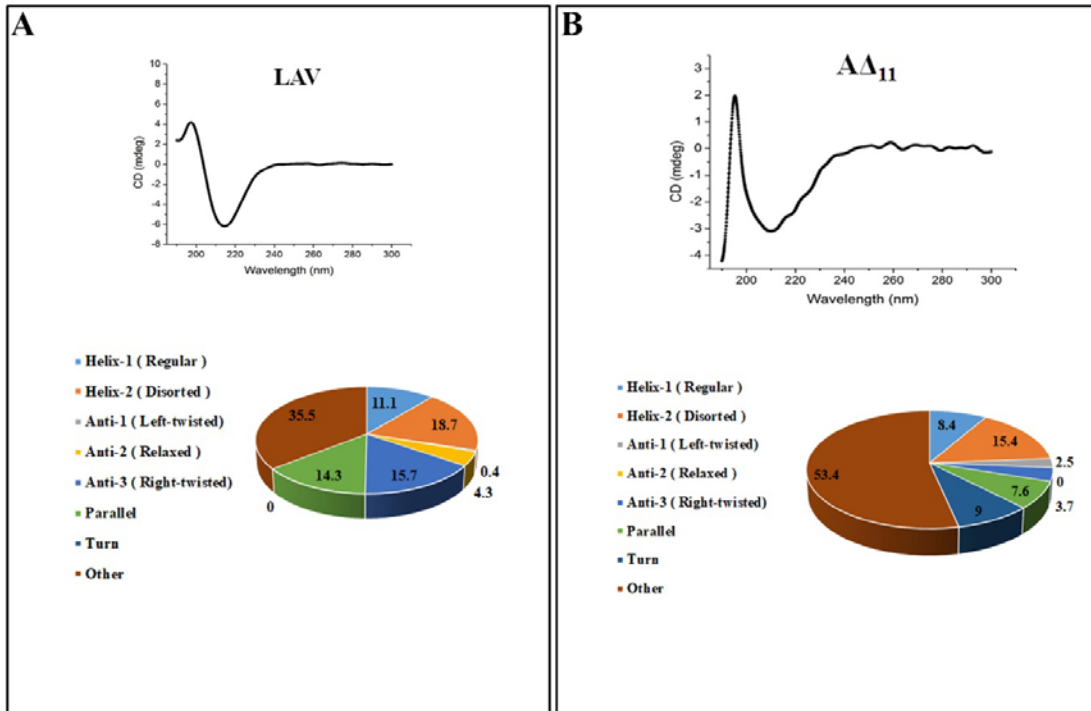

1217

1218

1219

1220

1221

1222 **Sup Fig. 3 Circular dichroism spectra of the recombinant proteins.** CD spectra of

1223 recombinant proteins LigA WT and LigA $\Delta$ 11. Far-UV CD spectra are presented as an

1224 average of five scans recorded from 190 to 300 nm.

1225

1226

1227

1228

1229

1230

1231

1232

1233

1234

1235

1236

1237 **Figure S4**

1238

1239

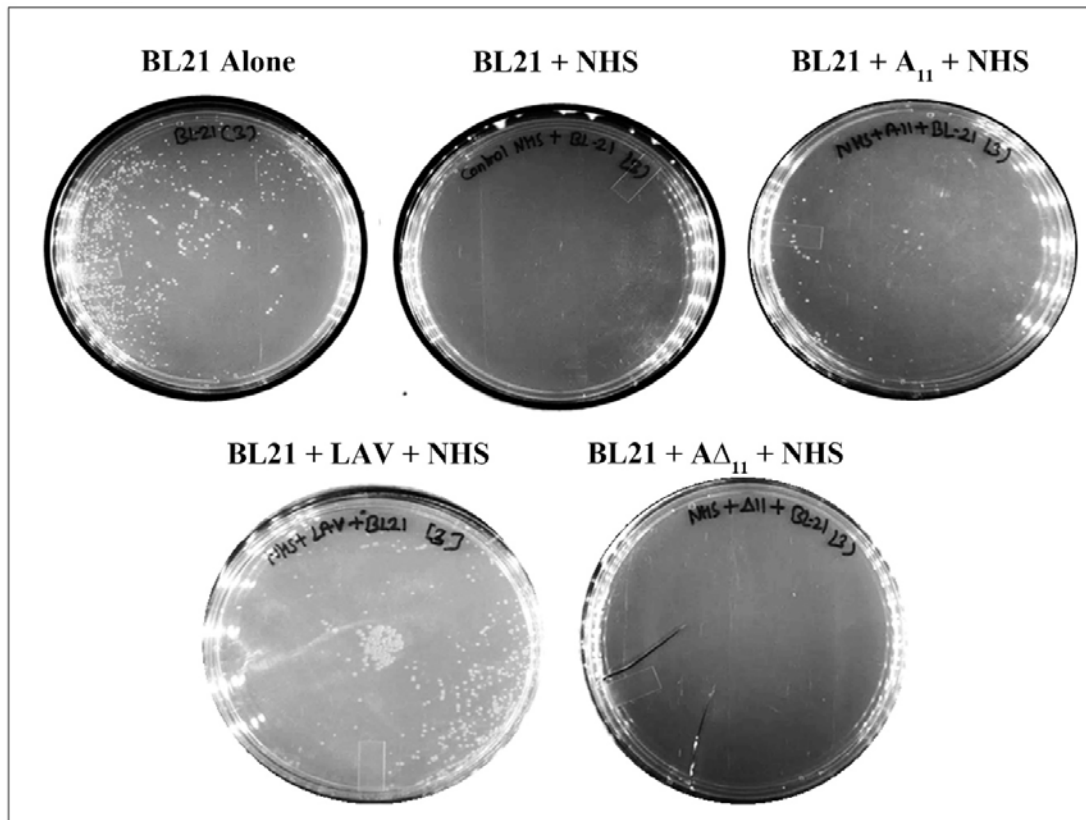

1240

1241

1242

1243

1244 **Sup Fig. 4. Bacterial survival assay.** Photographic images of survival assay bacterial  
1245 colonies formed by BL-21 *E. coli* after the treatment with NHS, which is pre-incubated with  
1246 LigAvWT,  $\Delta$ 11 and A11.

1247

1248

1249

1250

1251

1252 **Table1. Primers used for RT-PCR**

| S.NO | Gene          | Primer Sequence                                              |
|------|---------------|--------------------------------------------------------------|
| 1    | GAPDH         | F- GCCTGGAGAAACCTGCC<br>R- ATACCAGGAAATGAGCTTGACA            |
| 2    | IL-4          | F- AGTTGTCATCCTGCTCTTC<br>R- GTGTTCTTCGTTGCTGTG              |
| 3    | CCL2          | F- ACGTGTTGGCTCAGCCAGA<br>R- ACTACAGCTTCCTTTGGGACACC         |
| 4    | COX-2         | F- TCTGGAACATTGTGAACAACATC<br>R- AAGCTCCTTATTTCCCTTCACAC     |
| 5    | iNOS          | F- CAGCCCAACAATACAAGATGACCC<br>R- CAGTTCCGAGCGTCAAAGACCTGC   |
| 6    | MCP1          | F- GGAAAATGGATCCACACCTTGC<br>R- TCTCTTCTCCACCACCATGCAG       |
| 7    | CXCL10        | F- CATGGTCCTGAGACAAAAGT<br>R- TGATGACACAAGTTCTTCCA           |
| 8    | CXCR4         | F- GAAGTGGGGTCTGGAGACTATG<br>R- AGGGGAGTGTGATGACAAAGAG       |
| 9    | CCR3          | F- CAACTTGGCAATTTCTGACCTG<br>R- GCAAACACAGCATGGACGATAG       |
| 10   | CCR5          | F - AACTCAGTATCATTCTGG<br>R- GGATCAGGCTCAAGATGACC            |
| 11   | IFN- $\gamma$ | F- ACTCAAGTGGCATAGATGTGGAAG<br>R- GACGCTTATGTTGTTGCTGATGG    |
| 12   | IL-1b         | F- GCCTTGGGCCTCAAAGGAAAGAATC<br>R- GGAAGACACAGATTCCATGGTGAAG |
| 13   | IL-10         | F- GCCAGAGCCACATGCTCCTA<br>R- GATAAGGCTTGCCAACCCAAGTAA       |
| 14   | IL-6          | F- TGGAGTCACAGAAGGAGTGGCTAAG<br>R- TCTGACCACAGTGAGGAATGTCCAC |
| 15   | TNF- $\alpha$ | F- ATAGCTCCCAGAAAAGCAAGC<br>R- CACCCCGAAGTTCAGTAGACA         |

1253

1254

1255

1256

1257

1258

1259

1260 **Table 2. Primers used for domain deletions**

| S.NO | Name | Primer Sequence                                                                    |
|------|------|------------------------------------------------------------------------------------|
| 1    | AΔ8  | F- ACCGTCACACAGGCGACTATTGCAGTTGGAAAACAT<br>R- ATGTTTTCCAAGTCAATAGTCGCCTGTGTGACGGT  |
| 2    | AΔ9  | F- TCAAATCAGTCCTGTAAAAGATTATCCGTTACCGCA<br>R- TGCGGTAACGGATAATCTTTTACAGGACTGATTTGA |
| 3    | AΔ10 | F- GCAGCGGAACTTATTGAGCAAGTTACTCCGGCTAAA<br>R- TTTAGCCGGAGTAACTTGCTCAATAAGTTCCGCTGC |
| 4    | AΔ11 | F- CAAGTACTCCGGCTAAATTGAATGTCACTCCAGCG<br>R- CGCTGGAGTGACATTCAATTTAGCCGGAGTAACTTG  |
| 5    | AΔ12 | F- ACTCCAGCGCTTCTTCGTCCAGTTACGGTTACGGAA<br>R- TTCCGTAACCGTAACTGGACGAAGAAGCGCTGGAGT |
| 6    | AΔ13 | F- GTTACGGAAAGTGGTATAGTAACTCCAGAAATATTA<br>R- TAATATTTCTGGAGTACTATACCACTTTCCGTAAC  |

1261

1262

1263

1264

1265
